# Supplementary material for: Three-coordinate organoboron with a BN bond: substituent effects, luminescence/electroluminescence and reactions with fluoride
Source: Royal Society of Chemistry journal article supplement (doi:10.1039/b703366d), 2007-01-01
Supplement: b703366d.pdf [file b703366d.pdf]

Supporting information

**Three-Coordinate Organoboron with a B=N Bond: Substituent Effects,  
Luminescence/Electroluminescence and Reactions with fluoride**

Yi Cui,<sup>†</sup> Fenghong Li,<sup>‡</sup> Zheng Hong Lu,<sup>‡</sup> Suning Wang,<sup>\*†</sup>

[wangs@chem.queensu.ca](mailto:wangs@chem.queensu.ca)

Department of Chemistry, Queen's University, Kingston, Ontario, K7L 3N6, Canada,

Department of Materials Science and Engineering,

University of Toronto, Toronto, Ontario, M5S 3E4, Canada

<sup>†</sup> Queen's University

<sup>‡</sup> University of Toronto

**Figure 1S** Molecular structures of **1-5** projected down the indolyl plane with labeling schemes with 50% thermal ellipsoids.

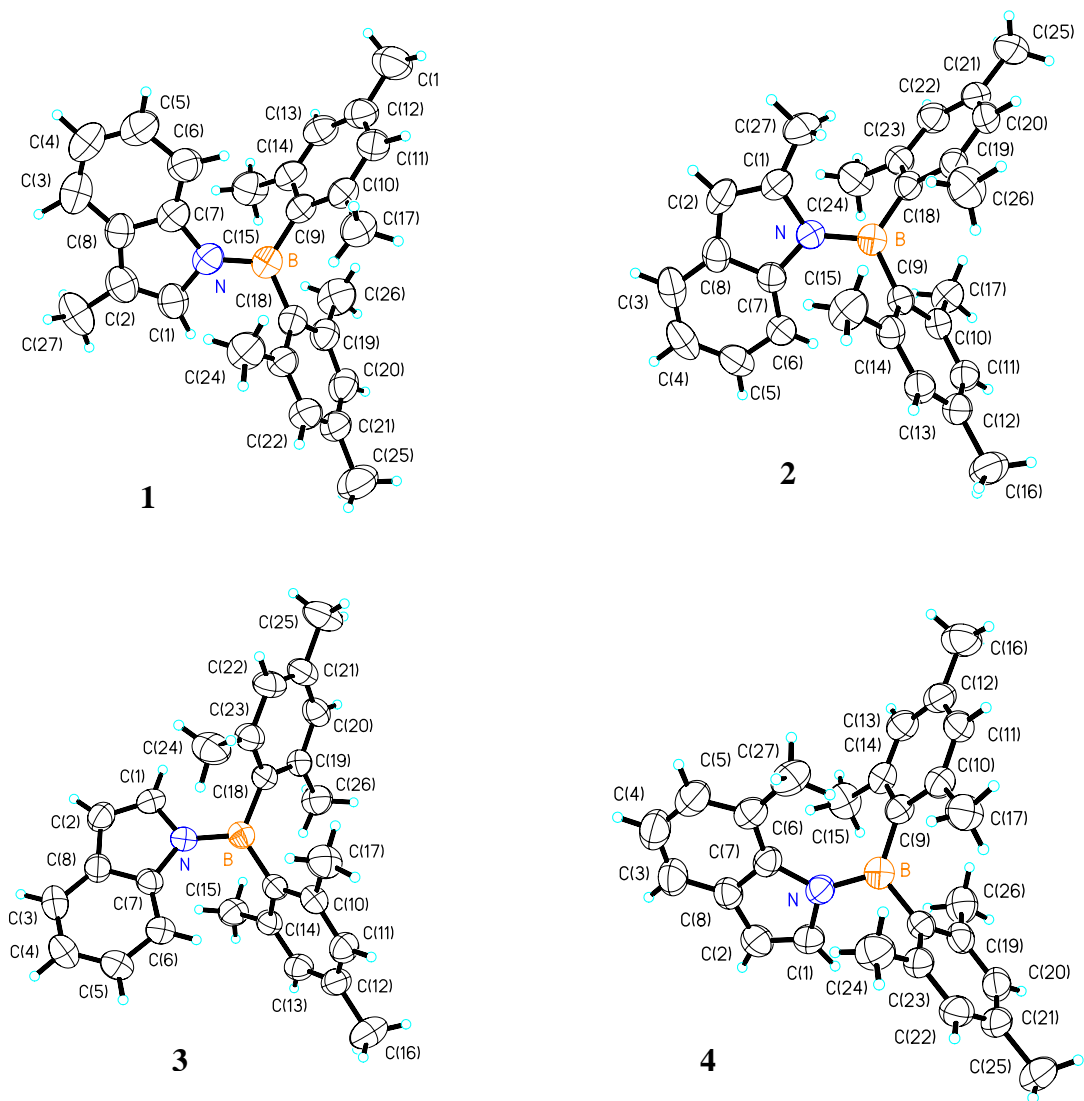

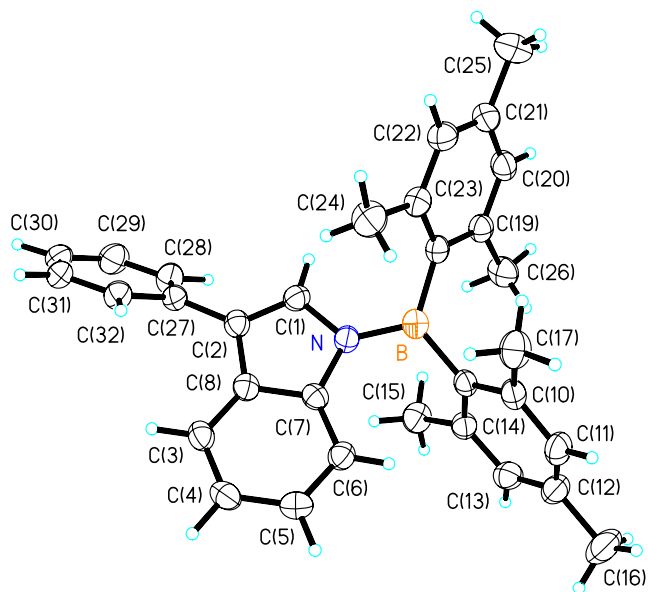

5

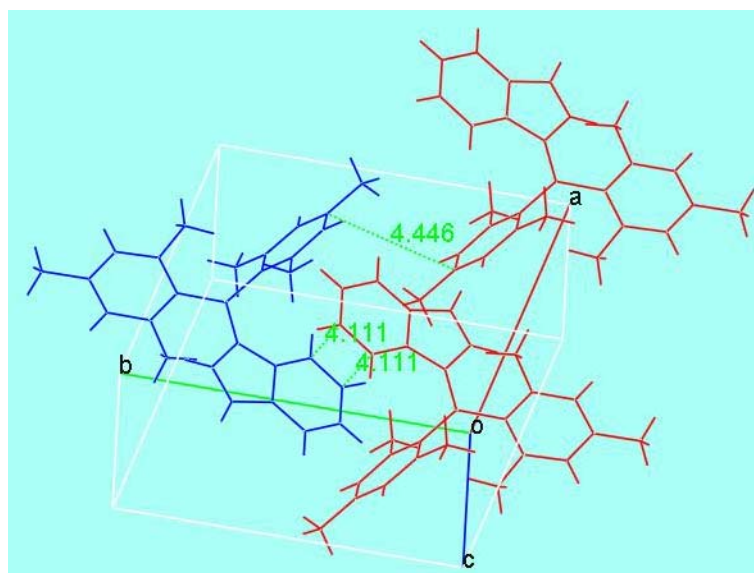

**Figure 2S-a** Packing diagram of compound 1

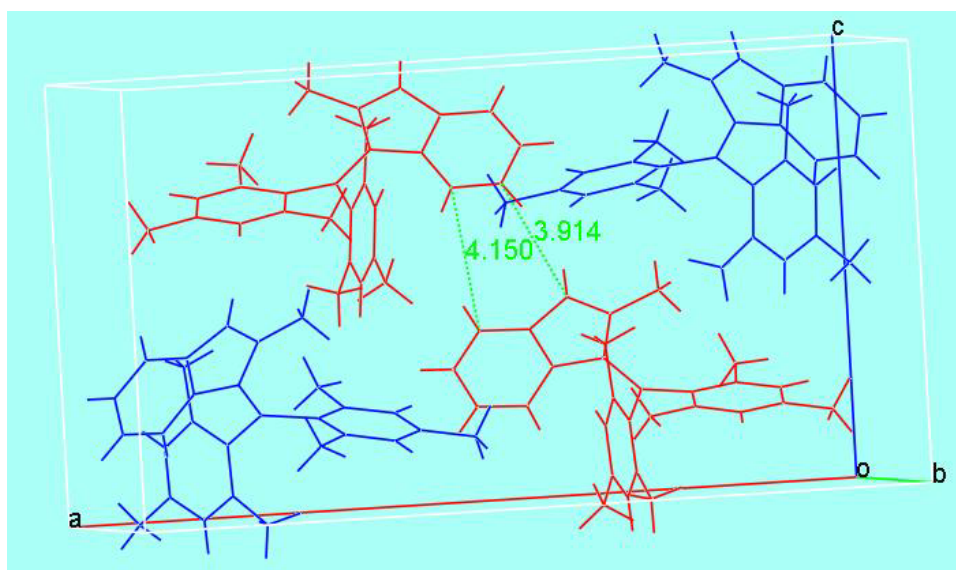

**Figure 2S-b** Packing diagram of compound 2

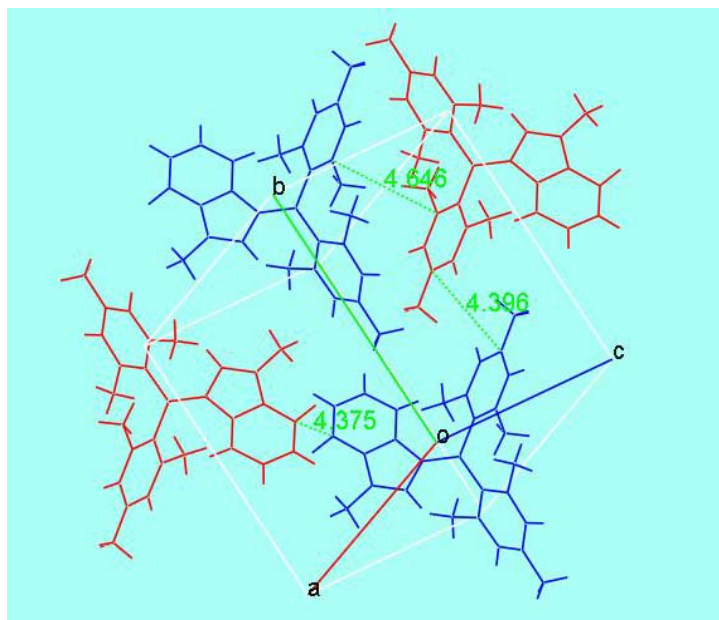

**Figure 2S-c** Packing diagram of compound **3**

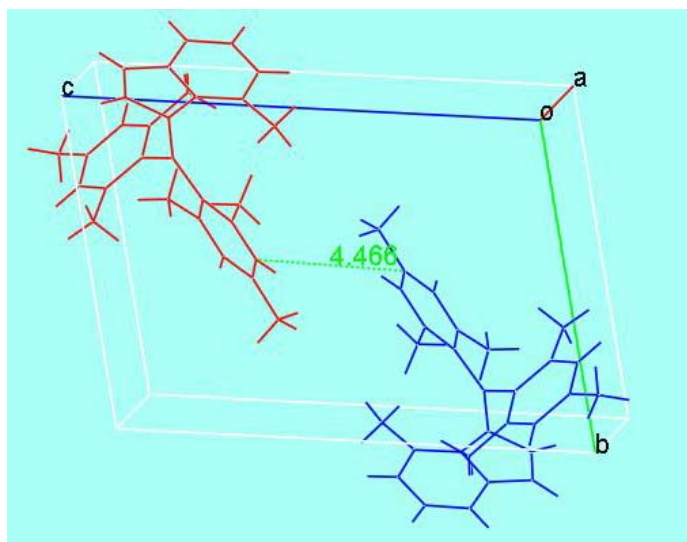

**Figure 2S-d** Packing diagram of compound **4**

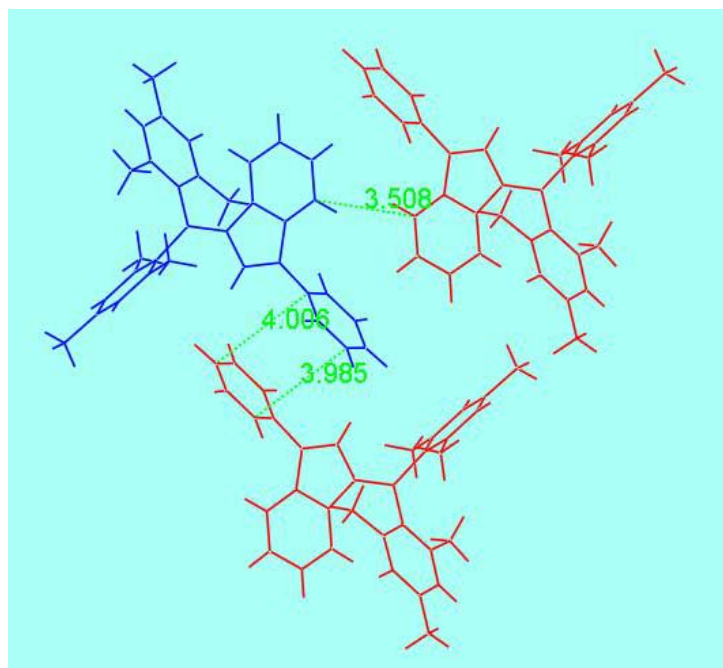

Figure 2S-e Packing diagram of compound 5

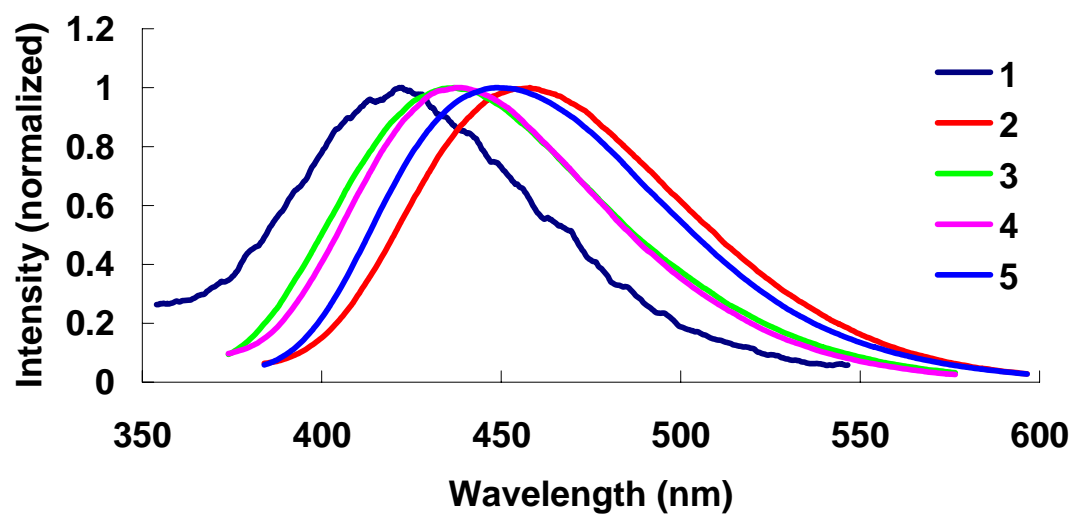

Figure 3s.. The photoluminescent spectra of **1-5** as films at ambient temperature.

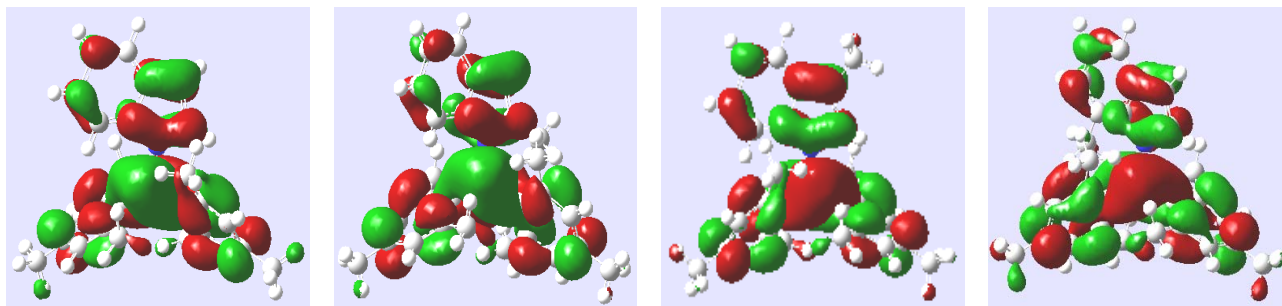

..... LUMO.....

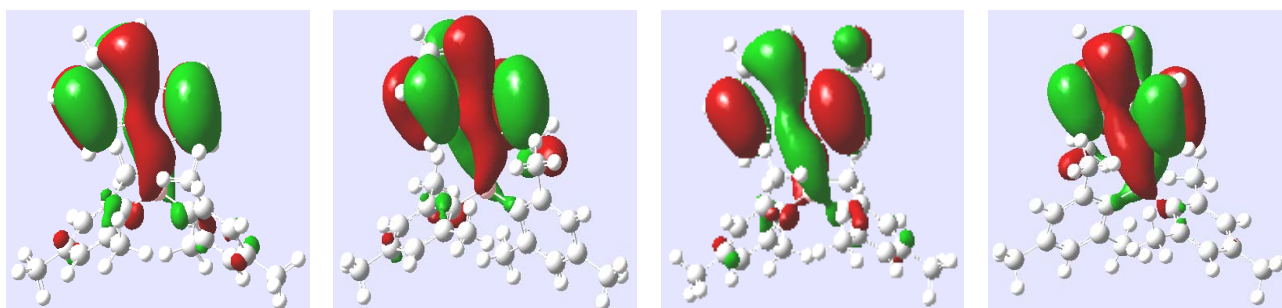

1

2

3

4

..... HOMO.....

Figure 4s. Diagrams showing the HOMO and LUMO levels of compounds **1-4** from optimized structures

**Figure 5s.**  $^1\text{H}$  (top) and  $^{13}\text{C}$  bottom NMR spectra of **1** at room temperature in  $\text{CDCl}_3$

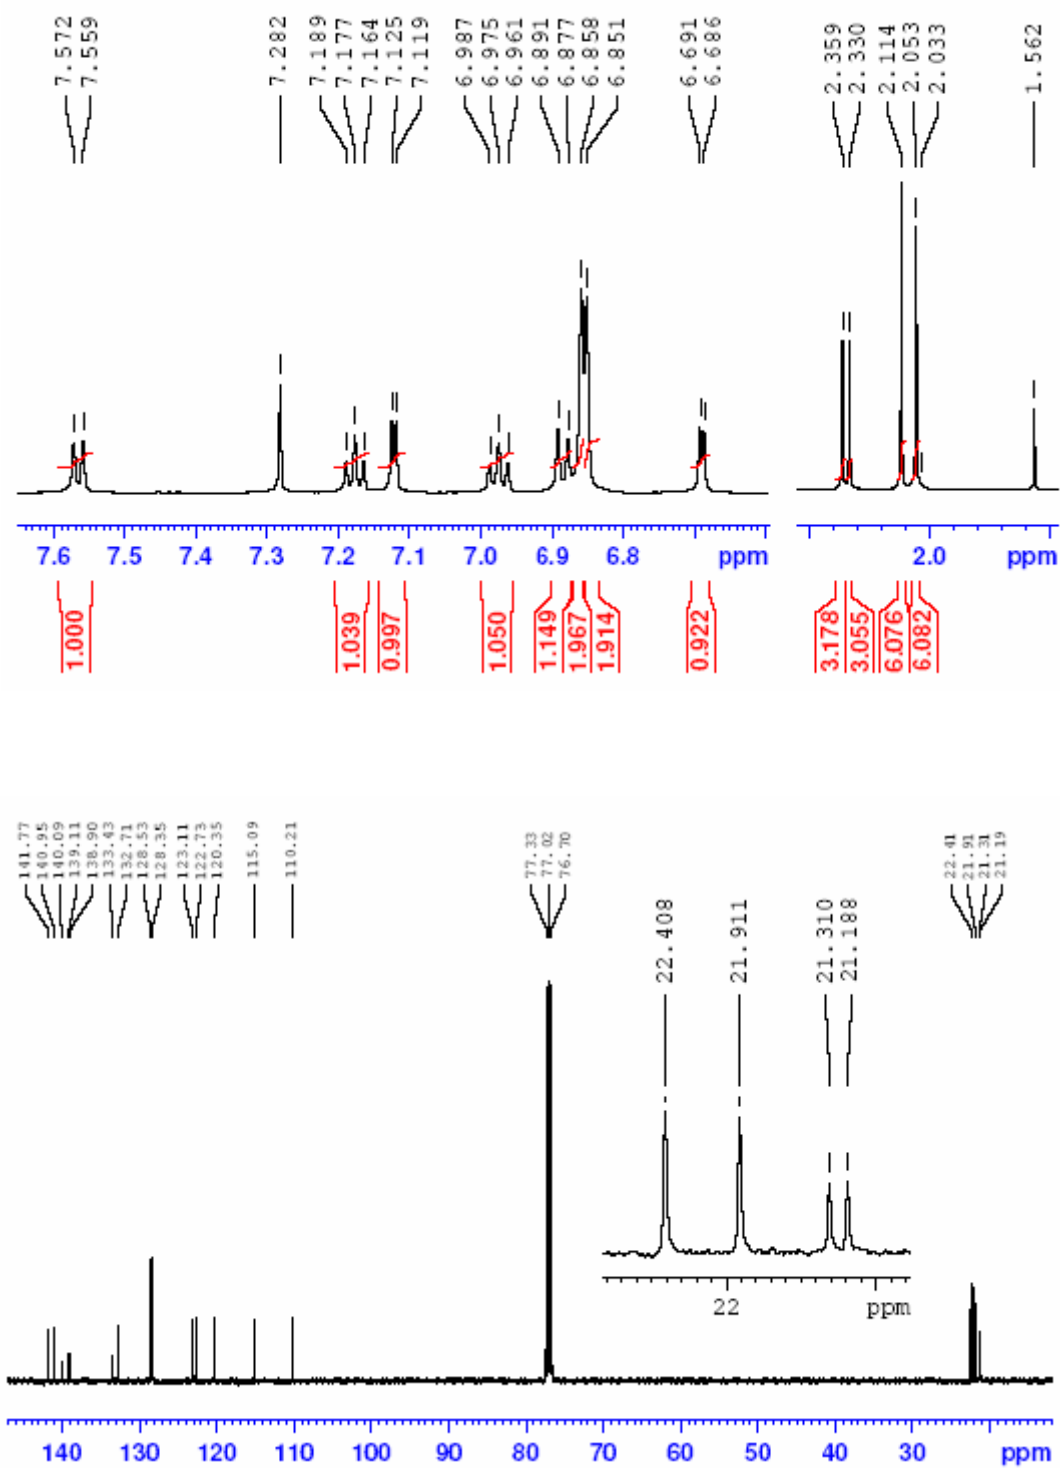



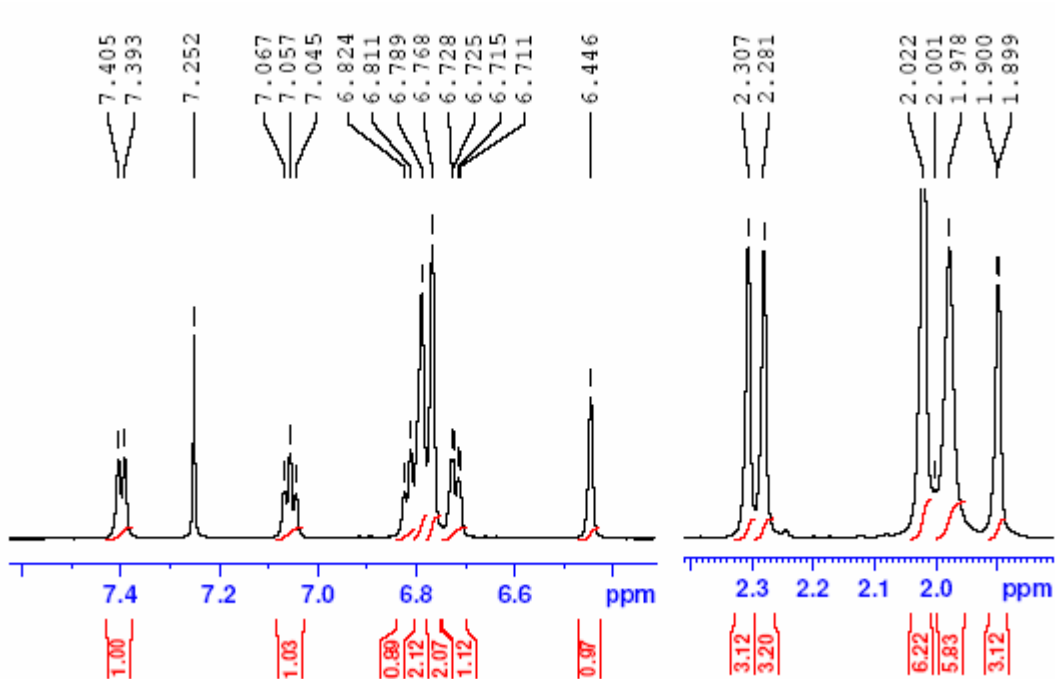

**Figure 6S**  $^1\text{H}$  NMR spectra of **2** at room temperature in  $\text{CDCl}_3$

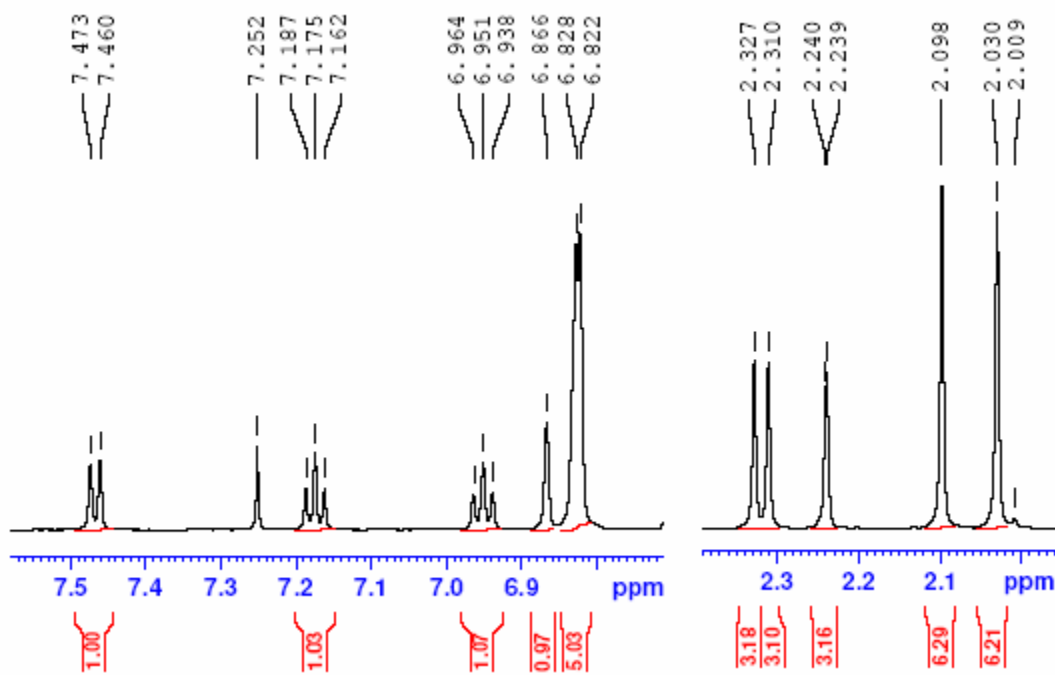

**Figure 7S.**  $^1\text{H}$  NMR spectra of **3** at room temperature in  $\text{CDCl}_3$

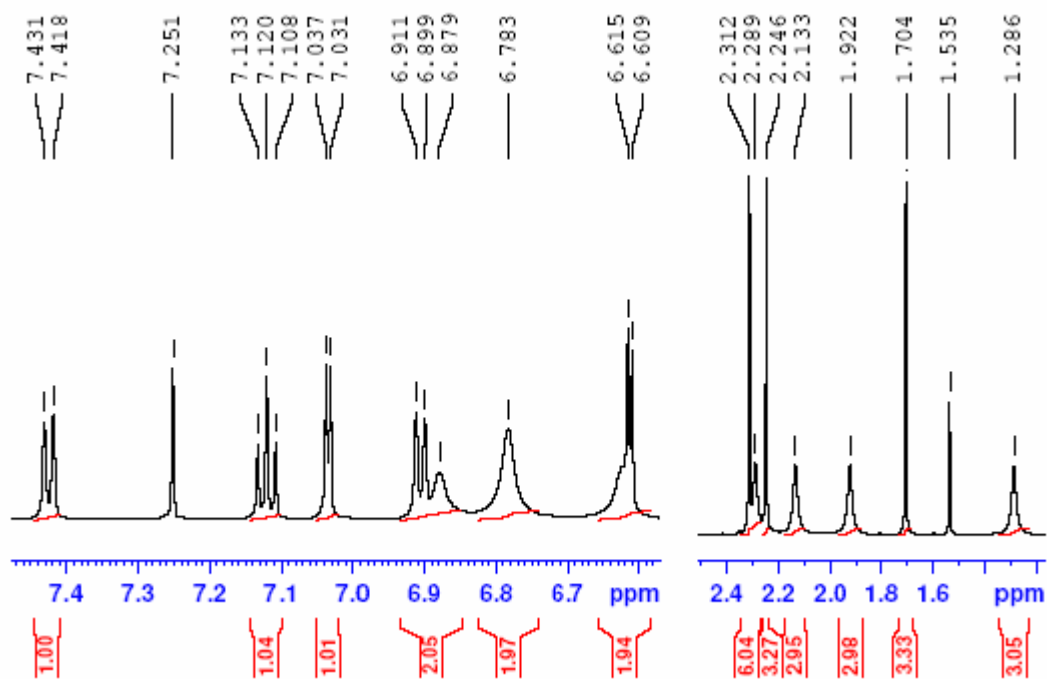

**Figure 8S.**  $^1\text{H}$  NMR spectra of **4** at room temperature in  $\text{CDCl}_3$

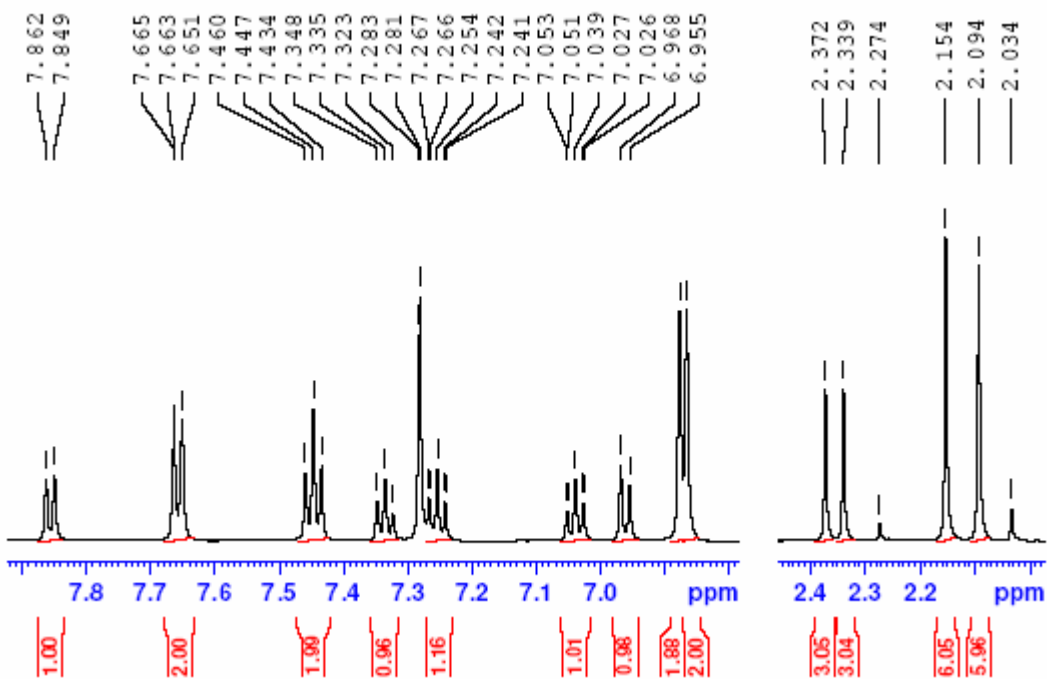

**Figure 9S.**  $^1\text{H}$  NMR spectra of **5** at room temperature in  $\text{CDCl}_3$

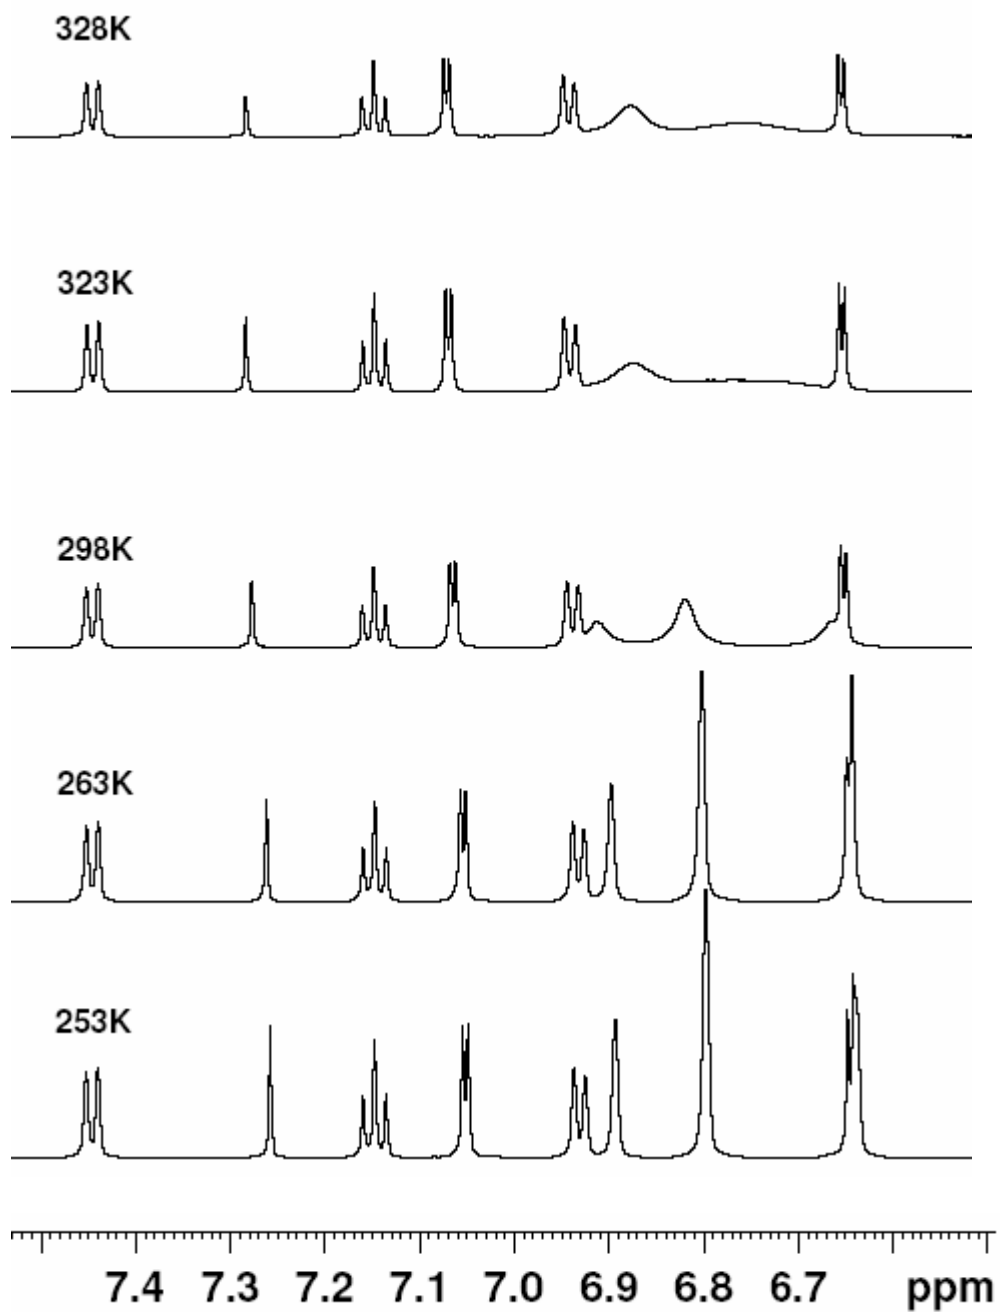

**Figure 10s.** Variable temperature <sup>1</sup>H NMR of **4** in CDCl<sub>3</sub> (the aromatic region)

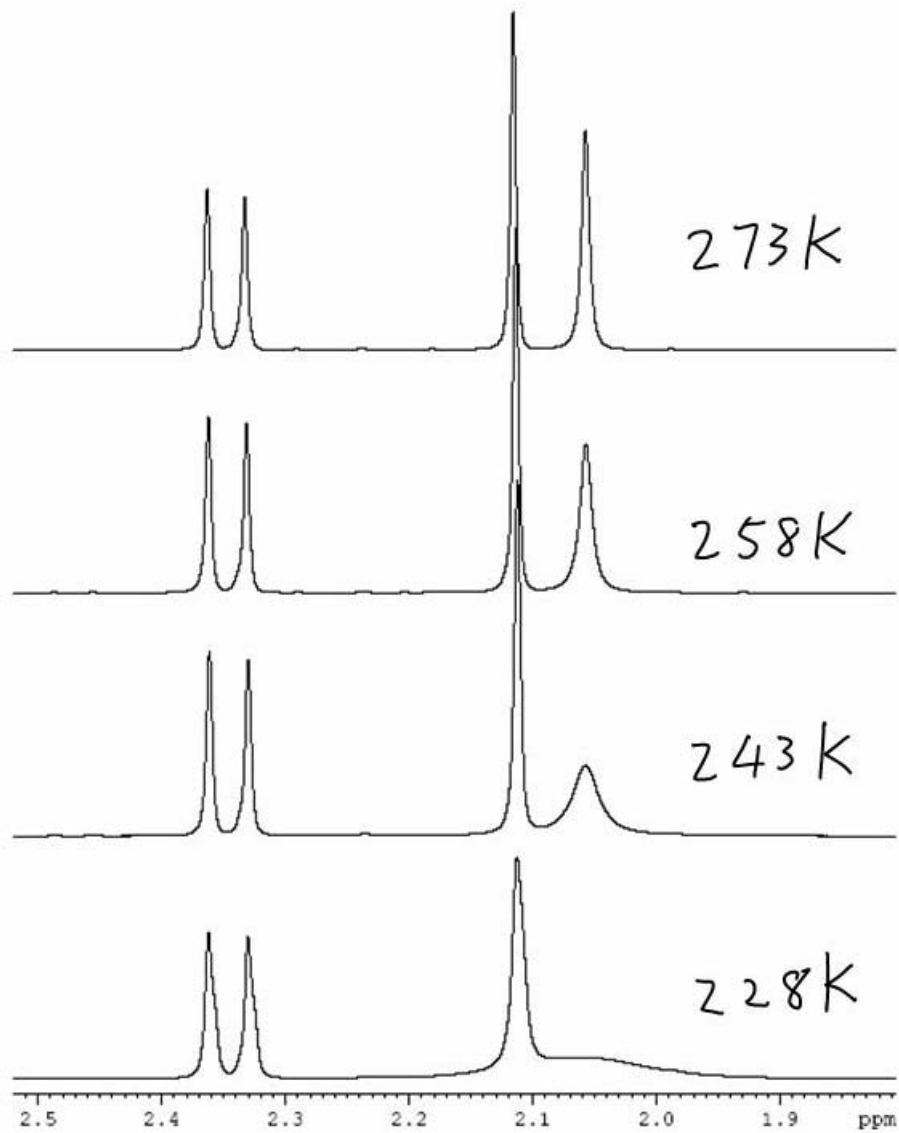

Figure 11s. The variable temperature  $^1\text{H}$  NMR of **1** in  $\text{CD}_2\text{Cl}_2$  (the methyl region).

Figure 12s.  $^{11}\text{B}$  NMR for 1-5

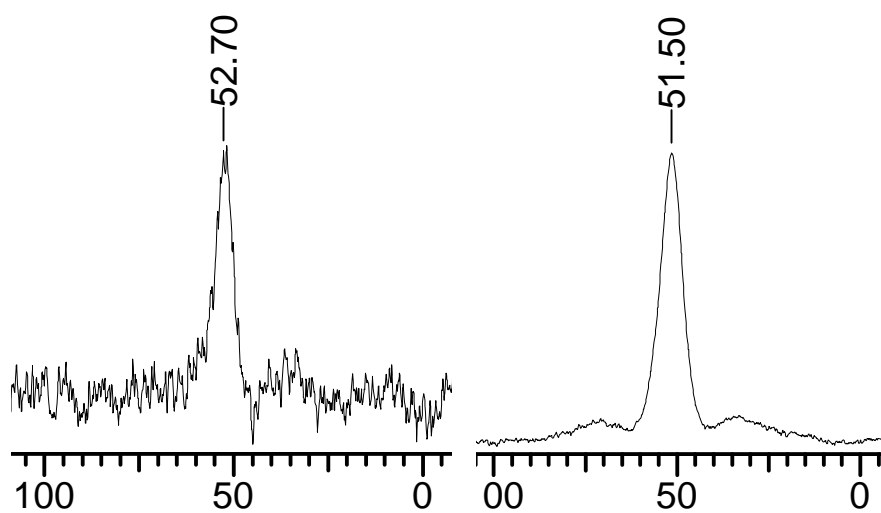

Compound 1

Compound 2

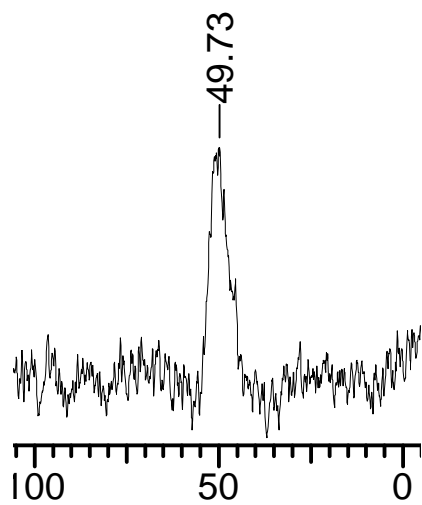

Compound 3

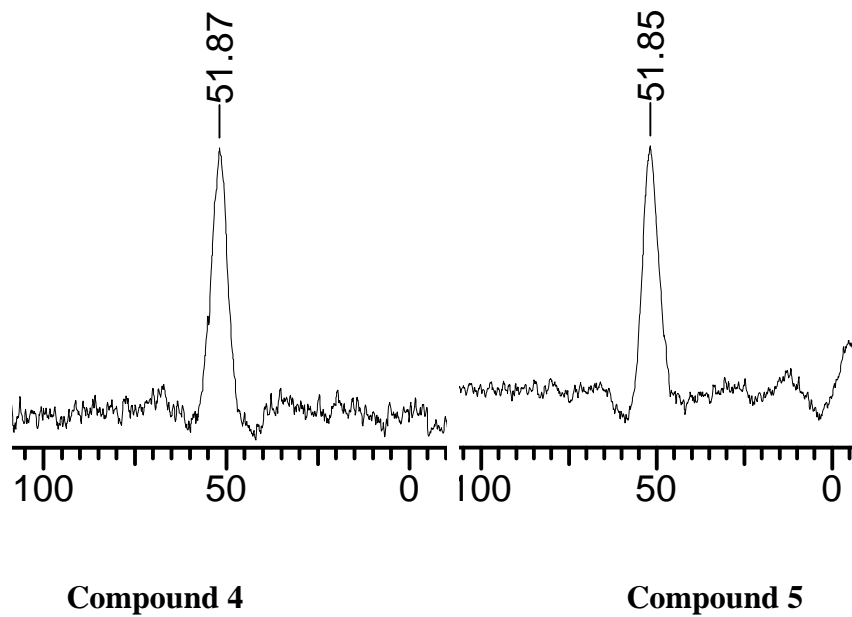

Figure 13s.  $^{19}\text{F}$  NMR of TBAF before and after the addition of **1** in  $\text{CD}_2\text{Cl}_2$ .

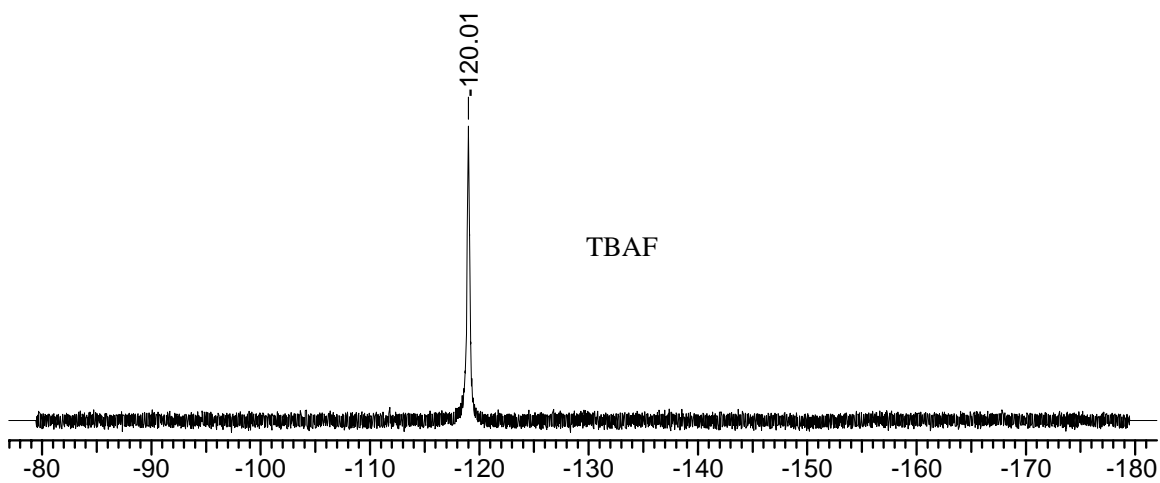

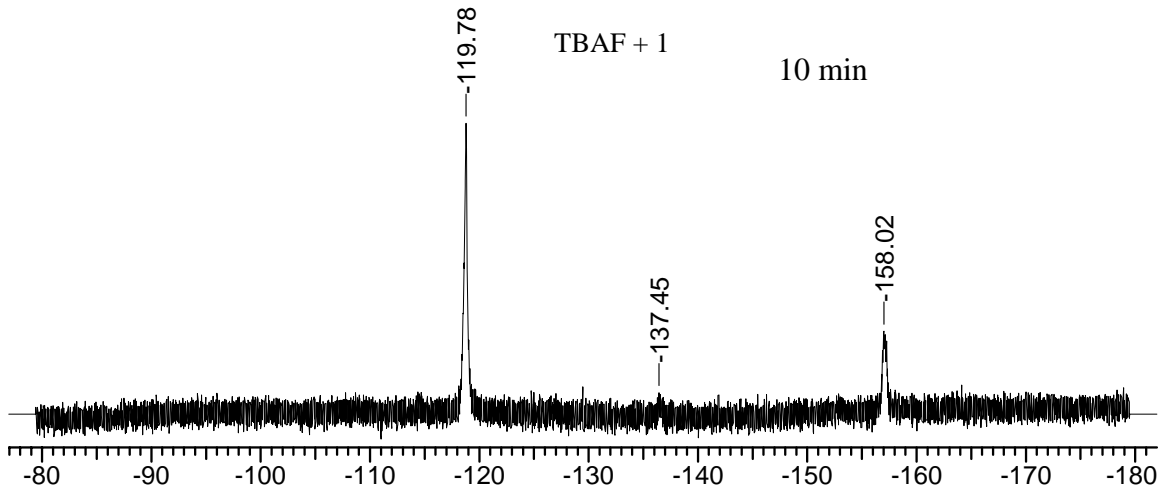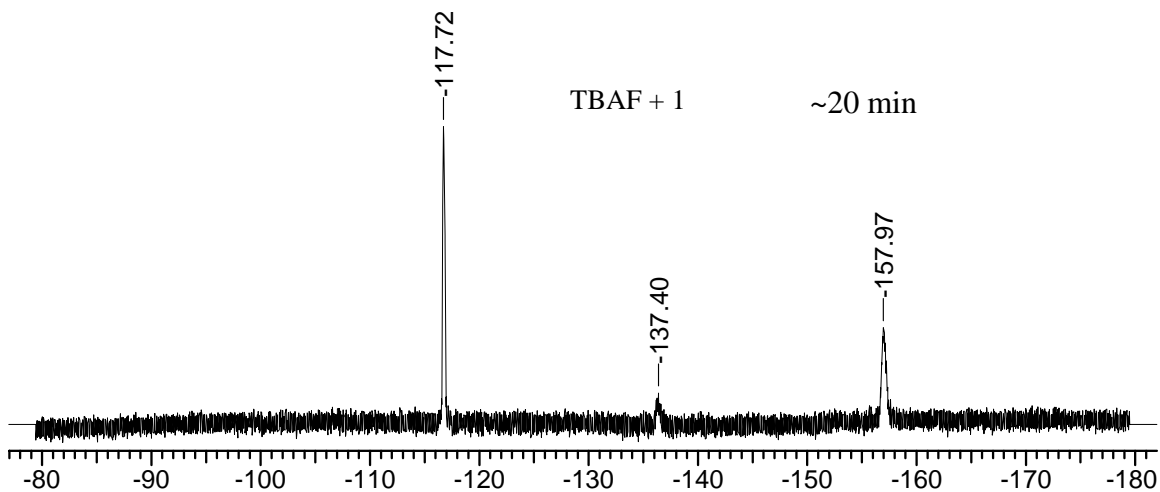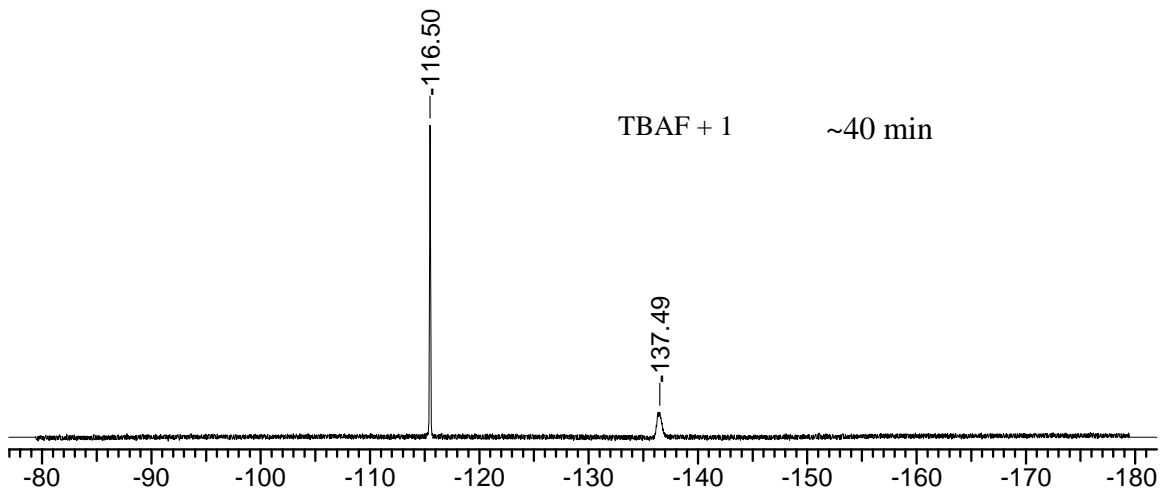

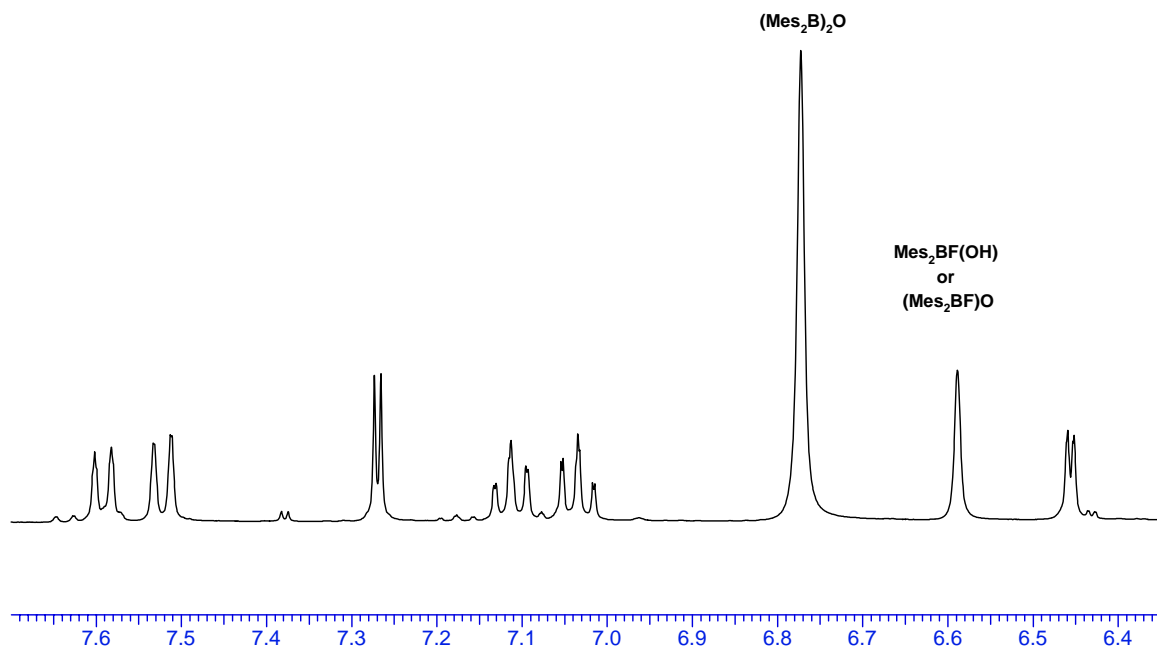

**Figure 14S**  $^1\text{H}$  NMR spectra of **1** and **TBAF** (1:1) at room temperature in  $\text{CDCl}_3$



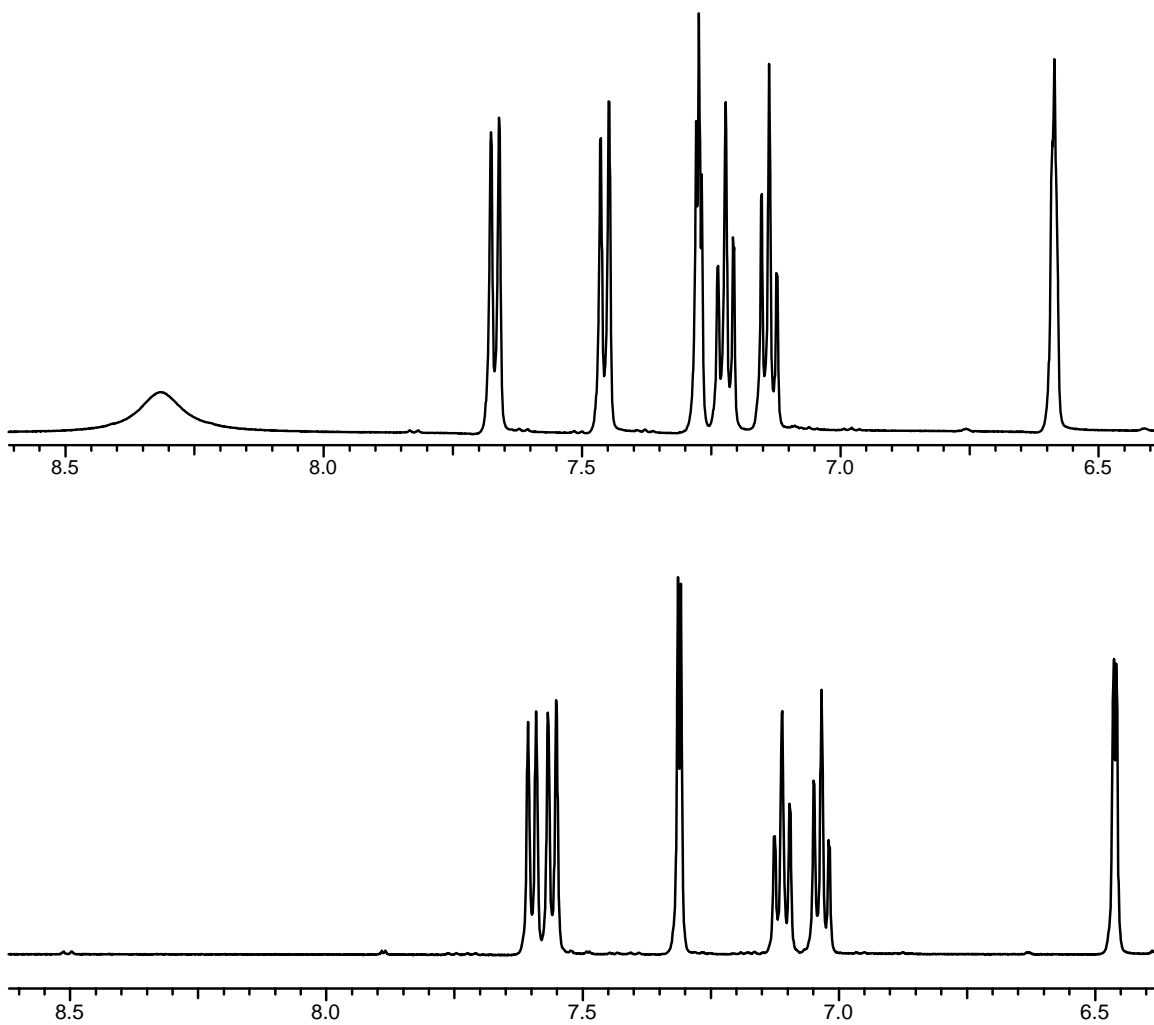

**Figure 15s.** <sup>1</sup>H-NMR (CD<sub>2</sub>Cl<sub>2</sub>, in 500MHz) for **indole** (top) and **Indole + TBAF** (1:1)

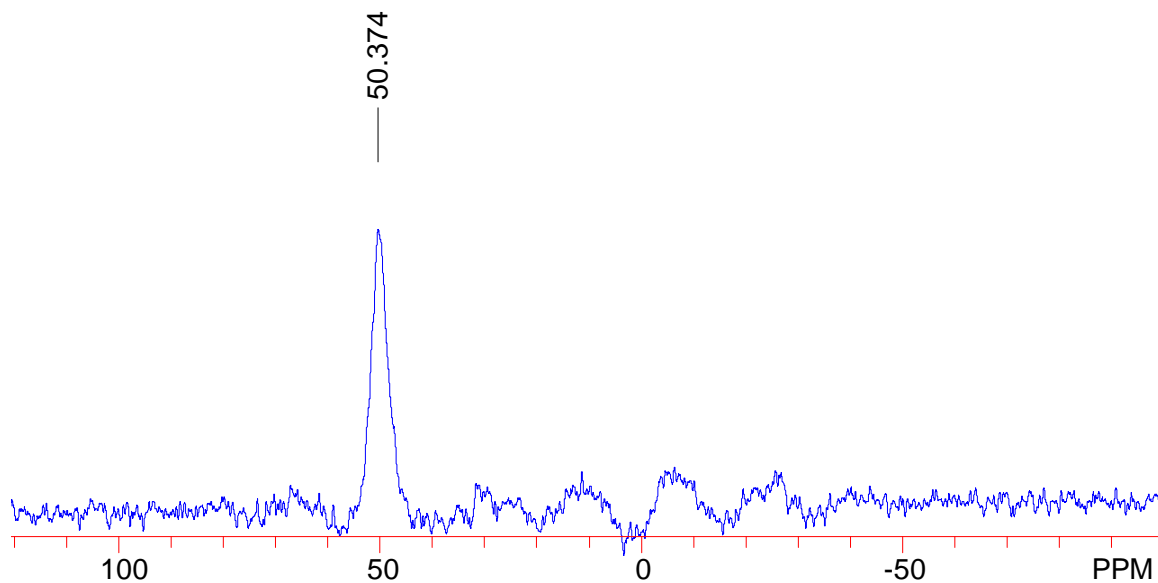

**Figure.16S.**  $^{11}\text{B}$ -NMR spectra of  $(\text{Mes}_2\text{B})_2\text{O}$  in the presence of **Indole** at room temperature in  $\text{CDCl}_3$

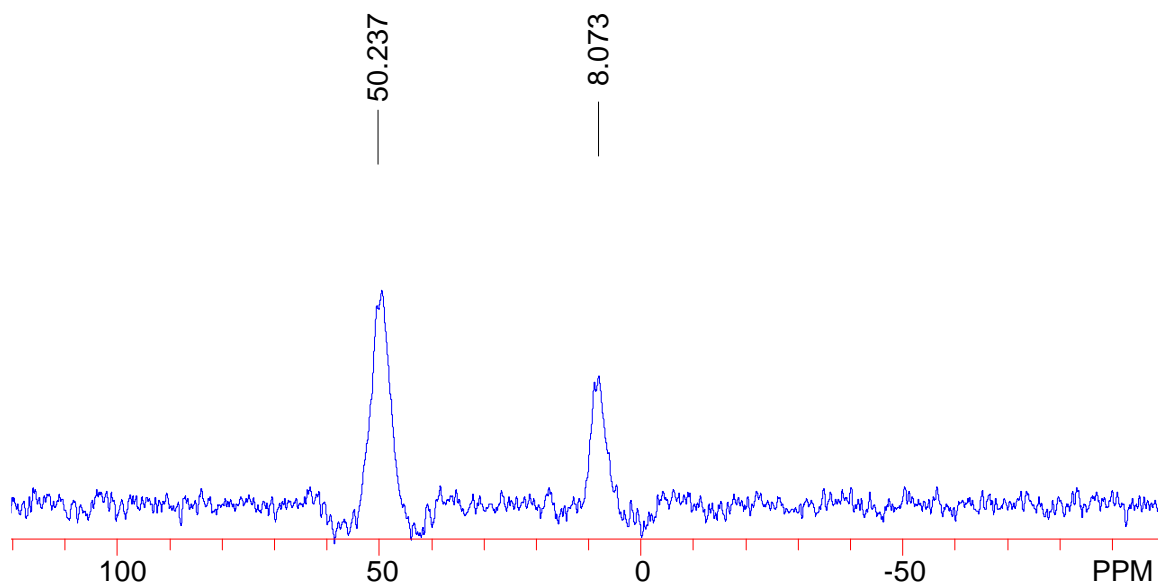

**Figure 17s.**  $^{11}\text{B}$ -NMR spectra of  $(\text{Mes}_2\text{B})_2\text{O}$  and **TBAF** (1:1) at RT in  $\text{CDCl}_3$

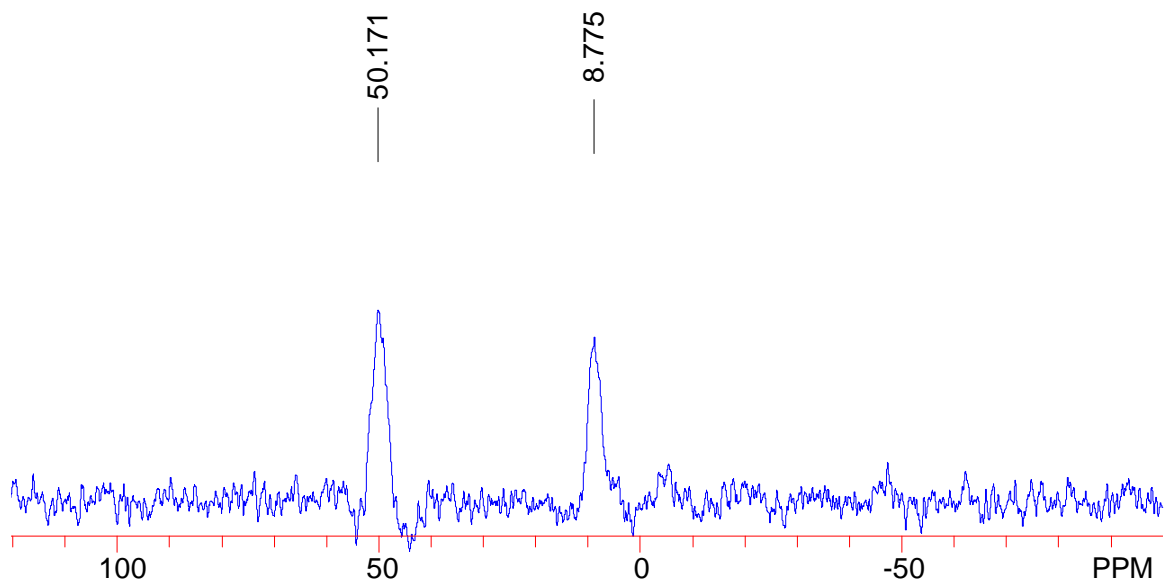

**Figure 18S**  $^{11}\text{B}$ -NMR spectra of the mixture of **1** and **TBAF** (1:1) at RT in  $\text{CDCl}_3$

**Figure 19s** The CV diagrams for compounds **1-5**

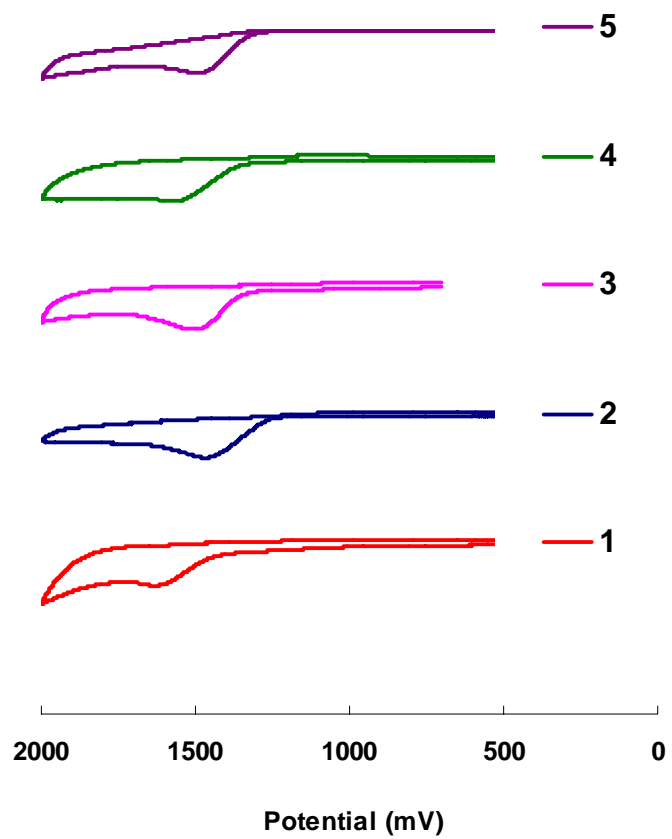

**Figure 20s. The structure of  $\{B(\text{mesityl})_2\}_2O$  (BOB) isolated from the mixture of TBAF + 1**

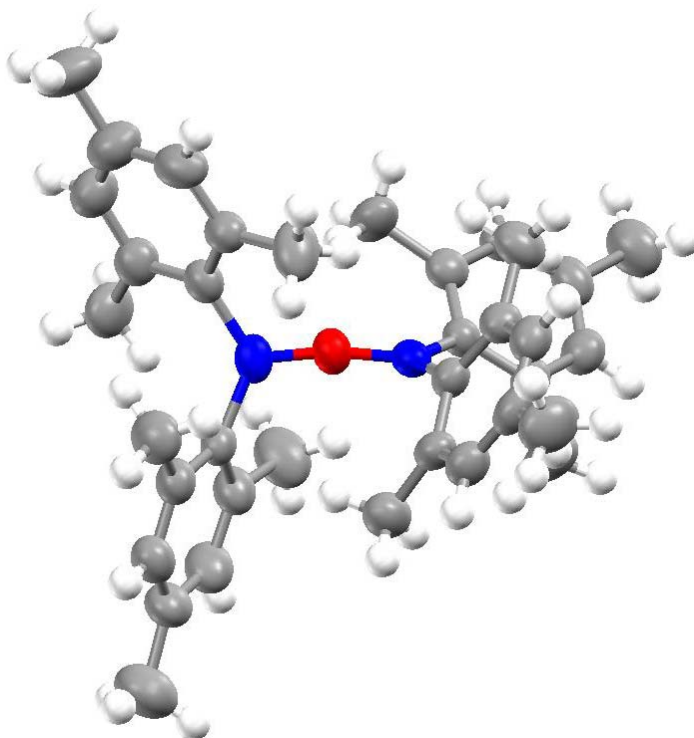

Table 1. Crystal data and structure refinement for 1.

|                                   |                                             |                  |
|-----------------------------------|---------------------------------------------|------------------|
| Identification code               | 1                                           |                  |
| Empirical formula                 | C <sub>26</sub> H <sub>28</sub> BN          |                  |
| Formula weight                    | 365.30                                      |                  |
| Temperature                       | 296(2) K                                    |                  |
| Wavelength                        | 0.71073 Å                                   |                  |
| Crystal system                    | Triclinic                                   |                  |
| Space group                       | P-1                                         |                  |
| Unit cell dimensions              | a = 8.2148(10) Å                            | α = 105.341(2)°. |
|                                   | b = 11.6163(13) Å                           | β = 94.143(2)°.  |
|                                   | c = 12.2308(14) Å                           | γ = 106.575(2)°. |
| Volume                            | 1064.9(2) Å <sup>3</sup>                    |                  |
| Z                                 | 2                                           |                  |
| Density (calculated)              | 1.139 Mg/m <sup>3</sup>                     |                  |
| Absorption coefficient            | 0.064 mm <sup>-1</sup>                      |                  |
| F(000)                            | 392                                         |                  |
| Crystal size                      | 0.20 x 0.20 x 0.15 mm <sup>3</sup>          |                  |
| Theta range for data collection   | 1.92 to 28.22°.                             |                  |
| Index ranges                      | -10 ≤ h ≤ 9, -15 ≤ k ≤ 13, -16 ≤ l ≤ 15     |                  |
| Reflections collected             | 7481                                        |                  |
| Independent reflections           | 4761 [R(int) = 0.0164]                      |                  |
| Completeness to theta = 28.22°    | 90.7 %                                      |                  |
| Absorption correction             | SADABS                                      |                  |
| Max. and min. transmission        | 1.000 and 0.820                             |                  |
| Refinement method                 | Full-matrix least-squares on F <sup>2</sup> |                  |
| Data / restraints / parameters    | 4761 / 0 / 259                              |                  |
| Goodness-of-fit on F <sup>2</sup> | 0.917                                       |                  |
| Final R indices [I > 2σ(I)]       | R1 = 0.0548, wR2 = 0.1406                   |                  |
| R indices (all data)              | R1 = 0.0955, wR2 = 0.1558                   |                  |
| Largest diff. peak and hole       | 0.279 and -0.144 e.Å <sup>-3</sup>          |                  |

Table 2. Atomic coordinates ( $\times 10^4$ ) and equivalent isotropic displacement parameters ( $\text{\AA}^2 \times 10^3$ ) for 1. U(eq) is defined as one third of the trace of the orthogonalized  $U^{ij}$  tensor.

|       | x        | y        | z       | U(eq) |
|-------|----------|----------|---------|-------|
| N     | 3503(2)  | 1677(1)  | 1962(1) | 48(1) |
| B     | 2236(3)  | 982(2)   | 2507(2) | 47(1) |
| C(1)  | 4112(2)  | 1146(2)  | 973(2)  | 55(1) |
| C(2)  | 5189(2)  | 2018(2)  | 623(2)  | 60(1) |
| C(3)  | 6392(3)  | 4440(2)  | 1549(2) | 73(1) |
| C(4)  | 6356(3)  | 5401(2)  | 2478(2) | 78(1) |
| C(5)  | 5325(3)  | 5154(2)  | 3297(2) | 68(1) |
| C(6)  | 4297(2)  | 3957(2)  | 3193(2) | 56(1) |
| C(7)  | 4331(2)  | 2988(2)  | 2248(2) | 47(1) |
| C(8)  | 5379(2)  | 3221(2)  | 1428(2) | 54(1) |
| C(9)  | 1101(2)  | 1665(1)  | 3231(2) | 44(1) |
| C(10) | 1041(2)  | 1726(2)  | 4392(2) | 50(1) |
| C(11) | 23(2)    | 2350(2)  | 5000(2) | 57(1) |
| C(12) | -976(2)  | 2910(2)  | 4502(2) | 57(1) |
| C(13) | -928(2)  | 2837(2)  | 3363(2) | 54(1) |
| C(14) | 70(2)    | 2233(2)  | 2713(2) | 48(1) |
| C(15) | -7(3)    | 2189(2)  | 1469(2) | 62(1) |
| C(16) | -2070(3) | 3586(2)  | 5185(2) | 86(1) |
| C(17) | 2127(3)  | 1170(2)  | 5013(2) | 66(1) |
| C(18) | 2067(2)  | -461(2)  | 2279(2) | 47(1) |
| C(19) | 492(2)   | -1415(2) | 1797(2) | 48(1) |
| C(20) | 411(3)   | -2673(2) | 1548(2) | 56(1) |
| C(21) | 1829(3)  | -3031(2) | 1790(2) | 59(1) |
| C(22) | 3360(3)  | -2087(2) | 2308(2) | 61(1) |
| C(23) | 3511(2)  | -817(2)  | 2551(2) | 55(1) |
| C(24) | 5241(3)  | 133(2)   | 3131(2) | 77(1) |
| C(25) | 1693(3)  | -4409(2) | 1520(2) | 86(1) |
| C(26) | -1147(2) | -1140(2) | 1512(2) | 66(1) |

Table 3. Bond lengths [ $\text{\AA}$ ] and angles [ $^\circ$ ] for 1.

|             |            |                   |            |
|-------------|------------|-------------------|------------|
| N-C(1)      | 1.400(2)   | C(7)-N-B          | 129.39(15) |
| N-C(7)      | 1.414(2)   | N-B-C(9)          | 119.17(14) |
| N-B         | 1.444(2)   | N-B-C(18)         | 115.99(15) |
| B-C(9)      | 1.566(3)   | C(9)-B-C(18)      | 124.81(15) |
| B-C(18)     | 1.587(2)   | C(2)-C(1)-N       | 111.87(16) |
| C(1)-C(2)   | 1.329(2)   | C(1)-C(2)-C(8)    | 107.34(17) |
| C(2)-C(8)   | 1.439(2)   | C(4)-C(3)-C(8)    | 119.37(19) |
| C(3)-C(4)   | 1.375(3)   | C(3)-C(4)-C(5)    | 120.52(19) |
| C(3)-C(8)   | 1.386(3)   | C(6)-C(5)-C(4)    | 121.3(2)   |
| C(4)-C(5)   | 1.393(3)   | C(5)-C(6)-C(7)    | 117.92(18) |
| C(5)-C(6)   | 1.373(2)   | C(6)-C(7)-C(8)    | 121.32(16) |
| C(6)-C(7)   | 1.392(2)   | C(6)-C(7)-N       | 130.12(16) |
| C(7)-C(8)   | 1.399(2)   | C(8)-C(7)-N       | 108.44(15) |
| C(9)-C(10)  | 1.408(2)   | C(3)-C(8)-C(7)    | 119.53(18) |
| C(9)-C(14)  | 1.420(2)   | C(3)-C(8)-C(2)    | 133.58(18) |
| C(10)-C(11) | 1.388(2)   | C(7)-C(8)-C(2)    | 106.79(16) |
| C(10)-C(17) | 1.511(2)   | C(10)-C(9)-C(14)  | 117.90(15) |
| C(11)-C(12) | 1.382(2)   | C(10)-C(9)-B      | 122.16(15) |
| C(12)-C(13) | 1.377(3)   | C(14)-C(9)-B      | 119.94(15) |
| C(12)-C(16) | 1.512(3)   | C(11)-C(10)-C(9)  | 120.01(16) |
| C(13)-C(14) | 1.386(2)   | C(11)-C(10)-C(17) | 118.72(16) |
| C(14)-C(15) | 1.506(2)   | C(9)-C(10)-C(17)  | 121.22(16) |
| C(18)-C(19) | 1.406(2)   | C(12)-C(11)-C(10) | 122.32(17) |
| C(18)-C(23) | 1.409(2)   | C(13)-C(12)-C(11) | 117.49(17) |
| C(19)-C(20) | 1.392(2)   | C(13)-C(12)-C(16) | 121.28(19) |
| C(19)-C(26) | 1.508(2)   | C(11)-C(12)-C(16) | 121.22(19) |
| C(20)-C(21) | 1.382(3)   | C(12)-C(13)-C(14) | 122.82(17) |
| C(21)-C(22) | 1.384(3)   | C(13)-C(14)-C(9)  | 119.44(16) |
| C(21)-C(25) | 1.516(2)   | C(13)-C(14)-C(15) | 118.20(15) |
| C(22)-C(23) | 1.392(2)   | C(9)-C(14)-C(15)  | 122.35(15) |
| C(23)-C(24) | 1.512(3)   | C(19)-C(18)-C(23) | 118.18(14) |
|             |            | C(19)-C(18)-B     | 121.45(15) |
| C(1)-N-C(7) | 105.52(14) | C(23)-C(18)-B     | 120.37(16) |
| C(1)-N-B    | 125.04(14) | C(20)-C(19)-C(18) | 119.95(17) |



|                   |            |                   |            |
|-------------------|------------|-------------------|------------|
| C(20)-C(19)-C(26) | 117.42(16) | C(22)-C(21)-C(25) | 121.50(19) |
| C(18)-C(19)-C(26) | 122.63(15) | C(21)-C(22)-C(23) | 122.23(18) |
| C(21)-C(20)-C(19) | 122.21(18) | C(22)-C(23)-C(18) | 119.79(17) |
| C(20)-C(21)-C(22) | 117.56(16) | C(22)-C(23)-C(24) | 117.65(17) |
| C(20)-C(21)-C(25) | 120.92(19) | C(18)-C(23)-C(24) | 122.54(15) |

Table 4. Anisotropic displacement parameters ( $\text{\AA}^2 \times 10^3$ ) for 1. The anisotropic displacement factor exponent takes the form:  $-2\pi^2 [ h^2 a^{*2} U^{11} + \dots + 2 h k a^* b^* U^{12} ]$

|       | $U^{11}$ | $U^{22}$ | $U^{33}$ | $U^{23}$ | $U^{13}$ | $U^{12}$ |
|-------|----------|----------|----------|----------|----------|----------|
| N     | 50(1)    | 41(1)    | 54(1)    | 14(1)    | 13(1)    | 18(1)    |
| B     | 44(1)    | 48(1)    | 50(1)    | 18(1)    | 2(1)     | 15(1)    |
| C(1)  | 57(1)    | 52(1)    | 57(1)    | 10(1)    | 15(1)    | 25(1)    |
| C(2)  | 58(1)    | 66(1)    | 61(1)    | 20(1)    | 20(1)    | 23(1)    |
| C(3)  | 69(2)    | 67(1)    | 86(2)    | 35(1)    | 29(1)    | 12(1)    |
| C(4)  | 77(2)    | 52(1)    | 98(2)    | 24(1)    | 22(1)    | 7(1)     |
| C(5)  | 72(2)    | 48(1)    | 79(2)    | 13(1)    | 14(1)    | 14(1)    |
| C(6)  | 58(1)    | 48(1)    | 61(1)    | 14(1)    | 12(1)    | 17(1)    |
| C(7)  | 46(1)    | 45(1)    | 55(1)    | 18(1)    | 8(1)     | 16(1)    |
| C(8)  | 49(1)    | 55(1)    | 60(1)    | 22(1)    | 13(1)    | 16(1)    |
| C(9)  | 44(1)    | 40(1)    | 49(1)    | 15(1)    | 8(1)     | 13(1)    |
| C(10) | 50(1)    | 45(1)    | 53(1)    | 17(1)    | 5(1)     | 11(1)    |
| C(11) | 64(1)    | 60(1)    | 46(1)    | 14(1)    | 13(1)    | 18(1)    |
| C(12) | 55(1)    | 54(1)    | 61(1)    | 10(1)    | 13(1)    | 20(1)    |
| C(13) | 51(1)    | 52(1)    | 64(1)    | 18(1)    | 7(1)     | 21(1)    |
| C(14) | 48(1)    | 44(1)    | 53(1)    | 16(1)    | 8(1)     | 15(1)    |
| C(15) | 69(1)    | 69(1)    | 60(1)    | 28(1)    | 9(1)     | 33(1)    |
| C(16) | 94(2)    | 96(2)    | 78(2)    | 13(1)    | 28(1)    | 51(2)    |
| C(17) | 76(2)    | 71(1)    | 57(1)    | 25(1)    | 7(1)     | 29(1)    |
| C(18) | 47(1)    | 44(1)    | 51(1)    | 17(1)    | 10(1)    | 16(1)    |
| C(19) | 49(1)    | 48(1)    | 49(1)    | 16(1)    | 11(1)    | 14(1)    |
| C(20) | 61(1)    | 47(1)    | 53(1)    | 15(1)    | 6(1)     | 9(1)     |
| C(21) | 81(2)    | 44(1)    | 52(1)    | 16(1)    | 12(1)    | 20(1)    |
| C(22) | 70(1)    | 57(1)    | 66(1)    | 23(1)    | 9(1)     | 32(1)    |
| C(23) | 53(1)    | 49(1)    | 65(1)    | 20(1)    | 8(1)     | 18(1)    |

|       |        |       |        |       |       |       |
|-------|--------|-------|--------|-------|-------|-------|
| C(24) | 55(1)  | 63(1) | 112(2) | 28(1) | -3(1) | 20(1) |
| C(25) | 126(2) | 50(1) | 81(2)  | 17(1) | 3(1)  | 34(1) |
| C(26) | 50(1)  | 64(1) | 78(2)  | 15(1) | 3(1)  | 14(1) |

---

Table 5. Hydrogen coordinates ( $\times 10^4$ ) and isotropic displacement parameters ( $\text{\AA}^2 \times 10^{-3}$ ) for 1.

|        | x     | y     | z    | U(eq) |
|--------|-------|-------|------|-------|
| H(1A)  | 3801  | 286   | 606  | 66    |
| H(2A)  | 5720  | 1878  | -24  | 72    |
| H(3A)  | 7090  | 4607  | 1007 | 88    |
| H(4A)  | 7026  | 6222  | 2559 | 93    |
| H(5A)  | 5334  | 5814  | 3927 | 82    |
| H(6A)  | 3599  | 3798  | 3737 | 67    |
| H(11A) | 12    | 2391  | 5769 | 69    |
| H(13A) | -1593 | 3208  | 3014 | 65    |
| H(15A) | -901  | 2507  | 1256 | 92    |
| H(15B) | -246  | 1335  | 1001 | 92    |
| H(15C) | 1077  | 2696  | 1355 | 92    |
| H(16A) | -2915 | 3690  | 4668 | 129   |
| H(16B) | -1352 | 4396  | 5667 | 129   |
| H(16C) | -2637 | 3100  | 5652 | 129   |
| H(17A) | 1818  | 1209  | 5761 | 99    |
| H(17B) | 3321  | 1638  | 5090 | 99    |
| H(17C) | 1933  | 308   | 4583 | 99    |
| H(20A) | -633  | -3293 | 1208 | 67    |
| H(22A) | 4320  | -2308 | 2501 | 73    |
| H(24A) | 5075  | 853   | 3653 | 115   |
| H(24B) | 5877  | 389   | 2561 | 115   |
| H(24C) | 5869  | -241  | 3547 | 115   |
| H(25A) | 841   | -4889 | 852  | 128   |
| H(25B) | 1367  | -4702 | 2161 | 128   |
| H(25C) | 2786  | -4509 | 1376 | 128   |
| H(26A) | -1022 | -718  | 931  | 100   |
| H(26B) | -1382 | -611  | 2189 | 100   |
| H(26C) | -2082 | -1915 | 1234 | 100   |

Table 1. Crystal data and structure refinement for 2.

|                                   |                                                  |          |
|-----------------------------------|--------------------------------------------------|----------|
| Identification code               | 2                                                |          |
| Empirical formula                 | C <sub>27</sub> H <sub>30</sub> B <sub>3</sub> N |          |
| Formula weight                    | 379.33                                           |          |
| Temperature                       | 298(2) K                                         |          |
| Wavelength                        | 0.71073 Å                                        |          |
| Crystal system                    | Orthorhombic                                     |          |
| Space group                       | Pna2(1)                                          |          |
| Unit cell dimensions              | a = 22.3981(18) Å                                | α = 90°. |
|                                   | b = 8.1607(7) Å                                  | β = 90°. |
|                                   | c = 12.2170(10) Å                                | γ = 90°. |
| Volume                            | 2233.1(3) Å <sup>3</sup>                         |          |
| Z                                 | 4                                                |          |
| Density (calculated)              | 1.128 Mg/m <sup>3</sup>                          |          |
| Absorption coefficient            | 0.064 mm <sup>-1</sup>                           |          |
| F(000)                            | 816                                              |          |
| Crystal size                      | 0.40 x 0.30 x 0.20 mm <sup>3</sup>               |          |
| Theta range for data collection   | 1.82 to 28.25°.                                  |          |
| Index ranges                      | -27 ≤ h ≤ 28, -10 ≤ k ≤ 10, -14 ≤ l ≤ 15         |          |
| Reflections collected             | 14894                                            |          |
| Independent reflections           | 5067 [R(int) = 0.0275]                           |          |
| Completeness to theta = 28.25°    | 96.4 %                                           |          |
| Absorption correction             | SADABS                                           |          |
| Max. and min. transmission        | 1.000 and 0.810                                  |          |
| Refinement method                 | Full-matrix least-squares on F <sup>2</sup>      |          |
| Data / restraints / parameters    | 5067 / 1 / 281                                   |          |
| Goodness-of-fit on F <sup>2</sup> | 0.900                                            |          |
| Final R indices [I > 2σ(I)]       | R1 = 0.0384, wR2 = 0.0795                        |          |
| R indices (all data)              | R1 = 0.0686, wR2 = 0.0868                        |          |
| Absolute structure parameter      | Cannot be reliably determined                    |          |
| Largest diff. peak and hole       | 0.119 and -0.116 e.Å <sup>-3</sup>               |          |

Table 2. Atomic coordinates ( $\times 10^4$ ) and equivalent isotropic displacement parameters ( $\text{\AA}^2 \times 10^3$ ) for 2. U(eq) is defined as one third of the trace of the orthogonalized  $U^{ij}$  tensor.

|       | x        | y        | z       | U(eq) |
|-------|----------|----------|---------|-------|
| B     | 8295(1)  | 8388(2)  | 2561(2) | 46(1) |
| N     | 8653(1)  | 9374(2)  | 1821(1) | 48(1) |
| C(1)  | 8459(1)  | 10205(2) | 861(2)  | 56(1) |
| C(2)  | 8914(1)  | 11053(2) | 434(2)  | 63(1) |
| C(3)  | 10009(1) | 11488(2) | 1075(2) | 73(1) |
| C(4)  | 10397(1) | 11088(3) | 1900(3) | 80(1) |
| C(5)  | 10223(1) | 10086(2) | 2756(2) | 70(1) |
| C(6)  | 9653(1)  | 9421(2)  | 2796(2) | 60(1) |
| C(7)  | 9264(1)  | 9788(2)  | 1956(2) | 50(1) |
| C(8)  | 9433(1)  | 10846(2) | 1105(2) | 57(1) |
| C(9)  | 8604(1)  | 6955(2)  | 3212(1) | 44(1) |
| C(10) | 8559(1)  | 6845(2)  | 4370(1) | 46(1) |
| C(11) | 8814(1)  | 5526(2)  | 4915(2) | 52(1) |
| C(12) | 9115(1)  | 4283(2)  | 4367(2) | 53(1) |
| C(13) | 9152(1)  | 4393(2)  | 3244(2) | 53(1) |
| C(14) | 8912(1)  | 5699(2)  | 2655(2) | 50(1) |
| C(15) | 8982(1)  | 5674(2)  | 1425(2) | 74(1) |
| C(16) | 9380(1)  | 2853(2)  | 4981(2) | 77(1) |
| C(17) | 8267(1)  | 8160(2)  | 5041(2) | 61(1) |
| C(18) | 7613(1)  | 8797(2)  | 2696(2) | 47(1) |
| C(19) | 7166(1)  | 7614(2)  | 2519(1) | 52(1) |
| C(20) | 6571(1)  | 8000(3)  | 2704(2) | 61(1) |
| C(21) | 6395(1)  | 9514(2)  | 3094(2) | 63(1) |
| C(22) | 6832(1)  | 10664(2) | 3271(2) | 62(1) |
| C(23) | 7434(1)  | 10351(2) | 3063(2) | 54(1) |
| C(24) | 7880(1)  | 11718(2) | 3266(2) | 74(1) |
| C(25) | 5741(1)  | 9880(3)  | 3303(2) | 90(1) |
| C(26) | 7318(1)  | 5938(2)  | 2063(2) | 77(1) |
| C(27) | 7855(1)  | 9975(3)  | 383(2)  | 80(1) |

Table 3. Bond lengths [ $\text{\AA}$ ] and angles [ $^\circ$ ] for 2.

|             |            |                   |            |
|-------------|------------|-------------------|------------|
| B-N         | 1.452(2)   | N-B-C(9)          | 118.90(14) |
| B-C(18)     | 1.572(3)   | C(18)-B-C(9)      | 122.12(15) |
| B-C(9)      | 1.575(3)   | C(7)-N-C(1)       | 106.08(14) |
| N-C(7)      | 1.420(2)   | C(7)-N-B          | 126.32(14) |
| N-C(1)      | 1.423(2)   | C(1)-N-B          | 127.49(14) |
| C(1)-C(2)   | 1.338(3)   | C(2)-C(1)-N       | 109.63(17) |
| C(1)-C(27)  | 1.487(3)   | C(2)-C(1)-C(27)   | 127.27(19) |
| C(2)-C(8)   | 1.431(3)   | N-C(1)-C(27)      | 122.80(16) |
| C(3)-C(4)   | 1.370(3)   | C(1)-C(2)-C(8)    | 109.45(18) |
| C(3)-C(8)   | 1.393(3)   | C(4)-C(3)-C(8)    | 118.6(2)   |
| C(4)-C(5)   | 1.383(3)   | C(3)-C(4)-C(5)    | 121.19(18) |
| C(5)-C(6)   | 1.386(2)   | C(4)-C(5)-C(6)    | 121.2(2)   |
| C(6)-C(7)   | 1.379(3)   | C(7)-C(6)-C(5)    | 118.0(2)   |
| C(7)-C(8)   | 1.403(2)   | C(6)-C(7)-C(8)    | 121.04(17) |
| C(9)-C(14)  | 1.411(2)   | C(6)-C(7)-N       | 130.11(17) |
| C(9)-C(10)  | 1.421(2)   | C(8)-C(7)-N       | 108.60(16) |
| C(10)-C(11) | 1.389(2)   | C(3)-C(8)-C(7)    | 119.94(19) |
| C(10)-C(17) | 1.501(2)   | C(3)-C(8)-C(2)    | 133.80(19) |
| C(11)-C(12) | 1.390(2)   | C(7)-C(8)-C(2)    | 106.23(16) |
| C(12)-C(13) | 1.378(3)   | C(14)-C(9)-C(10)  | 117.97(15) |
| C(12)-C(16) | 1.508(2)   | C(14)-C(9)-B      | 120.74(16) |
| C(13)-C(14) | 1.393(2)   | C(10)-C(9)-B      | 121.23(14) |
| C(14)-C(15) | 1.511(3)   | C(11)-C(10)-C(9)  | 119.81(15) |
| C(18)-C(23) | 1.404(2)   | C(11)-C(10)-C(17) | 118.12(16) |
| C(18)-C(19) | 1.408(2)   | C(9)-C(10)-C(17)  | 122.00(15) |
| C(19)-C(20) | 1.387(2)   | C(10)-C(11)-C(12) | 122.28(17) |
| C(19)-C(26) | 1.516(3)   | C(13)-C(12)-C(11) | 117.46(16) |
| C(20)-C(21) | 1.382(3)   | C(13)-C(12)-C(16) | 121.50(17) |
| C(21)-C(22) | 1.374(2)   | C(11)-C(12)-C(16) | 121.03(18) |
| C(21)-C(25) | 1.516(3)   | C(12)-C(13)-C(14) | 122.77(16) |
| C(22)-C(23) | 1.396(2)   | C(13)-C(14)-C(9)  | 119.69(16) |
| C(23)-C(24) | 1.517(2)   | C(13)-C(14)-C(15) | 117.64(16) |
|             |            | C(9)-C(14)-C(15)  | 122.65(16) |
| N-B-C(18)   | 118.98(15) | C(23)-C(18)-C(19) | 117.70(14) |

|                   |            |                   |            |
|-------------------|------------|-------------------|------------|
| C(23)-C(18)-B     | 120.18(13) | C(22)-C(21)-C(25) | 121.82(19) |
| C(19)-C(18)-B     | 122.02(14) | C(20)-C(21)-C(25) | 120.66(18) |
| C(20)-C(19)-C(18) | 120.21(16) | C(21)-C(22)-C(23) | 122.34(17) |
| C(20)-C(19)-C(26) | 118.77(16) | C(22)-C(23)-C(18) | 119.97(15) |
| C(18)-C(19)-C(26) | 120.93(15) | C(22)-C(23)-C(24) | 118.09(15) |
| C(21)-C(20)-C(19) | 122.21(17) | C(18)-C(23)-C(24) | 121.92(14) |
| C(22)-C(21)-C(20) | 117.52(16) |                   |            |

Table 4. Anisotropic displacement parameters ( $\text{\AA}^2 \times 10^3$ ) for 2. The anisotropic displacement factor exponent takes the form:  $-2\pi^2 [ h^2 a^{*2} U^{11} + \dots + 2 h k a^* b^* U^{12} ]$

|       | $U^{11}$ | $U^{22}$ | $U^{33}$ | $U^{23}$ | $U^{13}$ | $U^{12}$ |
|-------|----------|----------|----------|----------|----------|----------|
| B     | 54(1)    | 41(1)    | 43(1)    | -10(1)   | -1(1)    | -5(1)    |
| N     | 49(1)    | 49(1)    | 47(1)    | 3(1)     | 0(1)     | 2(1)     |
| C(1)  | 66(1)    | 53(1)    | 48(1)    | 3(1)     | 0(1)     | 7(1)     |
| C(2)  | 86(2)    | 57(1)    | 47(1)    | 12(1)    | 10(1)    | 6(1)     |
| C(3)  | 69(1)    | 70(1)    | 81(2)    | 0(1)     | 28(1)    | -7(1)    |
| C(4)  | 52(1)    | 79(1)    | 110(2)   | -17(1)   | 22(1)    | -10(1)   |
| C(5)  | 50(1)    | 72(1)    | 89(2)    | -6(1)    | -2(1)    | 1(1)     |
| C(6)  | 53(1)    | 57(1)    | 69(2)    | 6(1)     | 2(1)     | 0(1)     |
| C(7)  | 51(1)    | 45(1)    | 53(1)    | -2(1)    | 8(1)     | 5(1)     |
| C(8)  | 62(1)    | 52(1)    | 58(1)    | -2(1)    | 17(1)    | 1(1)     |
| C(9)  | 43(1)    | 44(1)    | 44(1)    | -3(1)    | 2(1)     | -4(1)    |
| C(10) | 47(1)    | 46(1)    | 47(1)    | -3(1)    | 4(1)     | -5(1)    |
| C(11) | 55(1)    | 56(1)    | 46(1)    | 3(1)     | -2(1)    | -5(1)    |
| C(12) | 51(1)    | 48(1)    | 59(1)    | 5(1)     | -2(1)    | -4(1)    |
| C(13) | 51(1)    | 45(1)    | 62(1)    | -4(1)    | 9(1)     | 4(1)     |
| C(14) | 50(1)    | 50(1)    | 51(1)    | -1(1)    | 9(1)     | -1(1)    |
| C(15) | 100(2)   | 68(1)    | 54(1)    | -6(1)    | 15(1)    | 14(1)    |
| C(16) | 85(1)    | 64(1)    | 83(2)    | 11(1)    | -4(1)    | 18(1)    |
| C(17) | 76(1)    | 57(1)    | 49(1)    | -7(1)    | 4(1)     | 5(1)     |
| C(18) | 51(1)    | 47(1)    | 45(1)    | 1(1)     | -1(1)    | -3(1)    |
| C(19) | 54(1)    | 55(1)    | 46(1)    | 6(1)     | -2(1)    | -7(1)    |
| C(20) | 51(1)    | 74(1)    | 59(1)    | 15(1)    | -5(1)    | -17(1)   |

|       |       |        |        |        |        |        |
|-------|-------|--------|--------|--------|--------|--------|
| C(21) | 48(1) | 80(1)  | 59(1)  | 20(1)  | 0(1)   | 4(1)   |
| C(22) | 61(1) | 63(1)  | 63(1)  | 4(1)   | 6(1)   | 13(1)  |
| C(23) | 51(1) | 52(1)  | 58(1)  | 3(1)   | 1(1)   | 1(1)   |
| C(24) | 73(1) | 48(1)  | 102(2) | -14(1) | 4(1)   | 1(1)   |
| C(25) | 52(1) | 119(2) | 99(2)  | 29(2)  | 5(1)   | 15(1)  |
| C(26) | 81(1) | 62(1)  | 87(2)  | -17(1) | -7(1)  | -18(1) |
| C(27) | 80(2) | 99(2)  | 61(1)  | 12(1)  | -14(1) | 5(1)   |

Table 5. Hydrogen coordinates ( $\times 10^4$ ) and isotropic displacement parameters ( $\text{\AA}^2 \times 10^{-3}$ ) for 2.

|        | x     | y     | z    | U(eq) |
|--------|-------|-------|------|-------|
| H(3A)  | 10128 | 12173 | 507  | 88    |
| H(4A)  | 10784 | 11498 | 1885 | 96    |
| H(5A)  | 10492 | 9854  | 3313 | 84    |
| H(11A) | 8783  | 5473  | 5674 | 63    |
| H(13A) | 9344  | 3560  | 2862 | 63    |
| H(15A) | 9164  | 4662  | 1205 | 111   |
| H(15B) | 9229  | 6574  | 1201 | 111   |
| H(15C) | 8596  | 5772  | 1088 | 111   |
| H(16A) | 9645  | 2259  | 4508 | 116   |
| H(16B) | 9065  | 2140  | 5222 | 116   |
| H(16C) | 9597  | 3249  | 5605 | 116   |
| H(17A) | 8248  | 7817  | 5792 | 91    |
| H(17B) | 7871  | 8355  | 4772 | 91    |
| H(17C) | 8497  | 9151  | 4989 | 91    |
| H(22A) | 6723  | 11688 | 3540 | 74    |
| H(24A) | 7686  | 12598 | 3649 | 112   |
| H(24B) | 8030  | 12112 | 2579 | 112   |
| H(24C) | 8204  | 11309 | 3700 | 112   |
| H(25A) | 5707  | 10863 | 3731 | 135   |
| H(25B) | 5563  | 8983  | 3694 | 135   |
| H(25C) | 5539  | 10027 | 2617 | 135   |
| H(26A) | 6983  | 5219  | 2152 | 115   |



|        |         |           |          |       |
|--------|---------|-----------|----------|-------|
| H(26B) | 7656    | 5500      | 2449     | 115   |
| H(26C) | 7413    | 6034      | 1299     | 115   |
| H(27A) | 7844    | 10442     | -338     | 120   |
| H(27B) | 7564    | 10508     | 837      | 120   |
| H(27C) | 7766    | 8826      | 340      | 120   |
| H(20)  | 6275(7) | 7254(19)  | 2580(15) | 55(5) |
| H(6)   | 9576(8) | 8790(20)  | 3343(16) | 60(6) |
| H(2)   | 8877(8) | 11630(20) | -218(17) | 68(6) |

---

Table 1. Crystal data and structure refinement for 3.

|                                   |                                             |                  |
|-----------------------------------|---------------------------------------------|------------------|
| Identification code               | 3                                           |                  |
| Empirical formula                 | C <sub>27</sub> H <sub>30</sub> B N         |                  |
| Formula weight                    | 379.33                                      |                  |
| Temperature                       | 296(2) K                                    |                  |
| Wavelength                        | 0.71073 Å                                   |                  |
| Crystal system                    | Triclinic                                   |                  |
| Space group                       | P-1                                         |                  |
| Unit cell dimensions              | a = 8.635(4) Å                              | α = 99.281(9)°.  |
|                                   | b = 11.606(6) Å                             | β = 98.716(9)°.  |
|                                   | c = 12.262(7) Å                             | γ = 107.487(9)°. |
| Volume                            | 1130.3(10) Å <sup>3</sup>                   |                  |
| Z                                 | 2                                           |                  |
| Density (calculated)              | 1.115 Mg/m <sup>3</sup>                     |                  |
| Absorption coefficient            | 0.063 mm <sup>-1</sup>                      |                  |
| F(000)                            | 408                                         |                  |
| Crystal size                      | 0.40 x 0.20 x 0.20 mm <sup>3</sup>          |                  |
| Theta range for data collection   | 1.72 to 25.00°.                             |                  |
| Index ranges                      | -9 ≤ h ≤ 10, -12 ≤ k ≤ 13, -14 ≤ l ≤ 14     |                  |
| Reflections collected             | 6724                                        |                  |
| Independent reflections           | 3961 [R(int) = 0.0326]                      |                  |
| Completeness to theta = 25.00°    | 99.4 %                                      |                  |
| Absorption correction             | SADABS                                      |                  |
| Max. and min. transmission        | 1.000 and 0.628                             |                  |
| Refinement method                 | Full-matrix least-squares on F <sup>2</sup> |                  |
| Data / restraints / parameters    | 3961 / 0 / 301                              |                  |
| Goodness-of-fit on F <sup>2</sup> | 0.983                                       |                  |
| Final R indices [I > 2σ(I)]       | R1 = 0.0549, wR2 = 0.1590                   |                  |
| R indices (all data)              | R1 = 0.0843, wR2 = 0.1761                   |                  |
| Largest diff. peak and hole       | 0.305 and -0.141 e.Å <sup>-3</sup>          |                  |

Table 2. Atomic coordinates ( $\times 10^4$ ) and equivalent isotropic displacement parameters ( $\text{\AA}^2 \times 10^3$ ) for 3. U(eq) is defined as one third of the trace of the orthogonalized  $U^{ij}$  tensor.

|       | x        | y        | z       | U(eq)  |
|-------|----------|----------|---------|--------|
| B     | 2845(3)  | 8751(2)  | 2312(2) | 55(1)  |
| N     | 1574(2)  | 8010(2)  | 2789(1) | 62(1)  |
| C(1)  | 1014(3)  | 8503(3)  | 3760(2) | 68(1)  |
| C(2)  | 43(3)    | 7588(3)  | 4137(2) | 76(1)  |
| C(3)  | -1065(3) | 5207(3)  | 3331(3) | 93(1)  |
| C(4)  | -1023(4) | 4313(3)  | 2463(3) | 97(1)  |
| C(5)  | -119(3)  | 4614(2)  | 1674(2) | 91(1)  |
| C(6)  | 830(3)   | 5837(2)  | 1716(2) | 72(1)  |
| C(7)  | 809(2)   | 6724(2)  | 2573(2) | 65(1)  |
| C(8)  | -147(2)  | 6454(2)  | 3389(2) | 64(1)  |
| C(9)  | 3941(2)  | 8118(2)  | 1689(2) | 54(1)  |
| C(10) | 4044(2)  | 8150(2)  | 569(2)  | 57(1)  |
| C(11) | 5045(3)  | 7598(2)  | 55(2)   | 66(1)  |
| C(12) | 5994(3)  | 7023(2)  | 632(2)  | 68(1)  |
| C(13) | 5898(3)  | 7007(2)  | 1740(2) | 68(1)  |
| C(14) | 4892(2)  | 7537(2)  | 2281(2) | 63(1)  |
| C(15) | 4897(3)  | 7464(2)  | 3499(2) | 82(1)  |
| C(16) | 7066(3)  | 6415(3)  | 69(2)   | 94(1)  |
| C(17) | 3038(3)  | 8747(2)  | -120(2) | 71(1)  |
| C(18) | 3103(2)  | 10177(2) | 2515(2) | 56(1)  |
| C(19) | 4652(2)  | 11066(2) | 3054(2) | 62(1)  |
| C(20) | 4813(3)  | 12314(2) | 3268(2) | 70(1)  |
| C(21) | 3535(3)  | 12734(2) | 2944(2) | 71(1)  |
| C(22) | 2033(3)  | 11865(2) | 2384(2) | 68(1)  |
| C(23) | 1781(2)  | 10607(2) | 2178(2) | 58(1)  |
| C(24) | 71(3)    | 9737(2)  | 1585(2) | 77(1)  |
| C(25) | 3768(4)  | 14102(2) | 3204(3) | 102(1) |
| C(26) | 6159(3)  | 10719(2) | 3438(2) | 90(1)  |
| C(27) | -715(3)  | 7720(3)  | 5149(2) | 96(1)  |

Table 3. Bond lengths [ $\text{\AA}$ ] and angles [ $^\circ$ ] for 3.

|             |            |                   |            |
|-------------|------------|-------------------|------------|
| B-N         | 1.442(3)   | N-B-C(18)         | 116.66(18) |
| B-C(9)      | 1.573(3)   | C(9)-B-C(18)      | 124.25(18) |
| B-C(18)     | 1.574(3)   | C(7)-N-B          | 130.45(18) |
| N-C(7)      | 1.401(3)   | C(7)-N-C(1)       | 105.49(18) |
| N-C(1)      | 1.449(3)   | B-N-C(1)          | 123.47(19) |
| C(1)-C(2)   | 1.336(3)   | C(2)-C(1)-N       | 110.7(2)   |
| C(2)-C(8)   | 1.426(3)   | C(1)-C(2)-C(8)    | 107.2(2)   |
| C(2)-C(27)  | 1.496(3)   | C(1)-C(2)-C(27)   | 126.7(3)   |
| C(3)-C(4)   | 1.374(4)   | C(8)-C(2)-C(27)   | 126.1(2)   |
| C(3)-C(8)   | 1.410(3)   | C(4)-C(3)-C(8)    | 118.6(3)   |
| C(4)-C(5)   | 1.357(4)   | C(5)-C(4)-C(3)    | 121.2(3)   |
| C(5)-C(6)   | 1.398(4)   | C(4)-C(5)-C(6)    | 121.8(3)   |
| C(6)-C(7)   | 1.354(3)   | C(7)-C(6)-C(5)    | 117.5(3)   |
| C(7)-C(8)   | 1.405(3)   | C(6)-C(7)-N       | 129.4(2)   |
| C(9)-C(10)  | 1.395(3)   | C(6)-C(7)-C(8)    | 122.4(2)   |
| C(9)-C(14)  | 1.403(3)   | N-C(7)-C(8)       | 108.04(19) |
| C(10)-C(11) | 1.386(3)   | C(7)-C(8)-C(3)    | 118.4(2)   |
| C(10)-C(17) | 1.509(3)   | C(7)-C(8)-C(2)    | 108.5(2)   |
| C(11)-C(12) | 1.387(3)   | C(3)-C(8)-C(2)    | 133.1(2)   |
| C(12)-C(13) | 1.375(3)   | C(10)-C(9)-C(14)  | 118.46(19) |
| C(12)-C(16) | 1.503(3)   | C(10)-C(9)-B      | 122.04(17) |
| C(13)-C(14) | 1.392(3)   | C(14)-C(9)-B      | 119.47(18) |
| C(14)-C(15) | 1.508(3)   | C(11)-C(10)-C(9)  | 120.3(2)   |
| C(18)-C(19) | 1.405(3)   | C(11)-C(10)-C(17) | 118.51(19) |
| C(18)-C(23) | 1.410(3)   | C(9)-C(10)-C(17)  | 121.12(18) |
| C(19)-C(20) | 1.390(3)   | C(10)-C(11)-C(12) | 121.7(2)   |
| C(19)-C(26) | 1.506(3)   | C(13)-C(12)-C(11) | 117.6(2)   |
| C(20)-C(21) | 1.366(3)   | C(13)-C(12)-C(16) | 120.8(2)   |
| C(21)-C(22) | 1.376(3)   | C(11)-C(12)-C(16) | 121.6(2)   |
| C(21)-C(25) | 1.512(3)   | C(12)-C(13)-C(14) | 122.4(2)   |
| C(22)-C(23) | 1.384(3)   | C(13)-C(14)-C(9)  | 119.5(2)   |
| C(23)-C(24) | 1.507(3)   | C(13)-C(14)-C(15) | 117.5(2)   |
|             |            | C(9)-C(14)-C(15)  | 123.01(19) |
| N-B-C(9)    | 119.00(19) | C(19)-C(18)-C(23) | 117.62(19) |

|                   |            |                   |            |
|-------------------|------------|-------------------|------------|
| C(19)-C(18)-B     | 121.20(18) | C(20)-C(21)-C(25) | 121.0(2)   |
| C(23)-C(18)-B     | 121.18(17) | C(22)-C(21)-C(25) | 121.6(2)   |
| C(20)-C(19)-C(18) | 119.6(2)   | C(21)-C(22)-C(23) | 122.3(2)   |
| C(20)-C(19)-C(26) | 118.0(2)   | C(22)-C(23)-C(18) | 120.1(2)   |
| C(18)-C(19)-C(26) | 122.4(2)   | C(22)-C(23)-C(24) | 117.78(19) |
| C(21)-C(20)-C(19) | 122.9(2)   | C(18)-C(23)-C(24) | 122.16(19) |
| C(20)-C(21)-C(22) | 117.4(2)   |                   |            |

Table 4. Anisotropic displacement parameters ( $\text{\AA}^2 \times 10^3$ ) for 3. The anisotropic displacement factor exponent takes the form:  $-2\pi^2 [ h^2 a^{*2} U^{11} + \dots + 2 h k a^* b^* U^{12} ]$

|       | $U^{11}$ | $U^{22}$ | $U^{33}$ | $U^{23}$ | $U^{13}$ | $U^{12}$ |
|-------|----------|----------|----------|----------|----------|----------|
| B     | 53(1)    | 58(2)    | 51(1)    | 14(1)    | 2(1)     | 15(1)    |
| N     | 66(1)    | 57(1)    | 63(1)    | 17(1)    | 12(1)    | 19(1)    |
| C(1)  | 63(1)    | 79(2)    | 63(1)    | 22(1)    | 15(1)    | 23(1)    |
| C(2)  | 64(1)    | 95(2)    | 69(2)    | 21(1)    | 14(1)    | 26(1)    |
| C(3)  | 81(2)    | 87(2)    | 107(2)   | 34(2)    | 27(2)    | 10(2)    |
| C(4)  | 96(2)    | 63(2)    | 117(2)   | 17(2)    | 26(2)    | 3(2)     |
| C(5)  | 97(2)    | 63(2)    | 103(2)   | 11(2)    | 18(2)    | 17(2)    |
| C(6)  | 74(1)    | 69(2)    | 74(2)    | 15(1)    | 15(1)    | 23(1)    |
| C(7)  | 61(1)    | 59(1)    | 71(1)    | 17(1)    | 6(1)     | 18(1)    |
| C(8)  | 52(1)    | 70(2)    | 66(1)    | 20(1)    | 12(1)    | 14(1)    |
| C(9)  | 54(1)    | 46(1)    | 58(1)    | 11(1)    | 5(1)     | 12(1)    |
| C(10) | 56(1)    | 47(1)    | 61(1)    | 10(1)    | 8(1)     | 11(1)    |
| C(11) | 71(1)    | 59(1)    | 62(1)    | 7(1)     | 17(1)    | 15(1)    |
| C(12) | 61(1)    | 58(1)    | 80(2)    | 6(1)     | 13(1)    | 18(1)    |
| C(13) | 63(1)    | 57(1)    | 80(2)    | 16(1)    | 3(1)     | 22(1)    |
| C(14) | 63(1)    | 55(1)    | 67(1)    | 13(1)    | 7(1)     | 18(1)    |
| C(15) | 97(2)    | 87(2)    | 70(2)    | 28(1)    | 7(1)     | 42(2)    |
| C(16) | 85(2)    | 92(2)    | 107(2)   | 3(2)     | 25(2)    | 39(2)    |
| C(17) | 82(1)    | 68(2)    | 62(1)    | 18(1)    | 9(1)     | 26(1)    |
| C(18) | 60(1)    | 54(1)    | 52(1)    | 13(1)    | 13(1)    | 16(1)    |
| C(19) | 60(1)    | 56(1)    | 60(1)    | 11(1)    | 10(1)    | 10(1)    |
| C(20) | 72(2)    | 57(2)    | 67(2)    | 9(1)     | 14(1)    | 5(1)     |

|       |        |        |        |       |       |       |
|-------|--------|--------|--------|-------|-------|-------|
| C(21) | 92(2)  | 54(1)  | 70(1)  | 14(1) | 31(1) | 20(1) |
| C(22) | 80(2)  | 62(2)  | 71(2)  | 22(1) | 24(1) | 31(1) |
| C(23) | 63(1)  | 55(1)  | 58(1)  | 15(1) | 15(1) | 20(1) |
| C(24) | 64(1)  | 76(2)  | 90(2)  | 21(1) | 5(1)  | 25(1) |
| C(25) | 135(2) | 57(2)  | 112(2) | 14(2) | 32(2) | 28(2) |
| C(26) | 65(1)  | 82(2)  | 102(2) | 9(2)  | -7(1) | 12(1) |
| C(27) | 80(2)  | 138(3) | 79(2)  | 23(2) | 34(1) | 42(2) |

Table 5. Hydrogen coordinates ( $\times 10^4$ ) and isotropic displacement parameters ( $\text{\AA}^2 \times 10^{-3}$ ) for 3.

|        | x         | y         | z        | U(eq)   |
|--------|-----------|-----------|----------|---------|
| H(1)   | 1390(30)  | 9390(20)  | 4090(19) | 82(7)   |
| H(3)   | -1720(40) | 5100(30)  | 3980(30) | 141(12) |
| H(4)   | -1740(40) | 3440(30)  | 2430(20) | 117(9)  |
| H(5A)  | -131      | 3989      | 1090     | 109     |
| H(6)   | 1420(30)  | 6050(20)  | 1120(19) | 72(6)   |
| H(11)  | 5080(20)  | 7602(19)  | -730(20) | 71(6)   |
| H(13)  | 6510(30)  | 6655(19)  | 2161(17) | 63(6)   |
| H(15A) | 5742      | 7137      | 3771     | 123     |
| H(15B) | 3832      | 6932      | 3553     | 123     |
| H(15C) | 5120      | 8277      | 3947     | 123     |
| H(16A) | 7674      | 6951      | -353     | 141     |
| H(16B) | 6378      | 5646      | -433     | 141     |
| H(16C) | 7831      | 6260      | 634      | 141     |
| H(17A) | 3297      | 9596      | 255      | 106     |
| H(17B) | 1876      | 8314      | -197     | 106     |
| H(17C) | 3301      | 8712      | -855     | 106     |
| H(20)  | 5900(30)  | 12880(20) | 3664(19) | 78(7)   |
| H(22)  | 1130(30)  | 12170(20) | 2172(19) | 80(7)   |
| H(24A) | -530      | 10180     | 1200     | 115     |
| H(24B) | -512      | 9401      | 2131     | 115     |
| H(24C) | 165       | 9075      | 1047     | 115     |
| H(25A) | 2717      | 14212     | 3237     | 153     |

|        |       |       |      |     |
|--------|-------|-------|------|-----|
| H(25B) | 4209  | 14470 | 2621 | 153 |
| H(25C) | 4526  | 14492 | 3918 | 153 |
| H(26A) | 7108  | 11456 | 3726 | 135 |
| H(26B) | 6358  | 10213 | 2810 | 135 |
| H(26C) | 5972  | 10266 | 4023 | 135 |
| H(27A) | -404  | 8581  | 5501 | 144 |
| H(27B) | -325  | 7290  | 5678 | 144 |
| H(27C) | -1903 | 7373  | 4918 | 144 |

---

Table 1. Crystal data and structure refinement for 4.

|                                   |                                             |                  |
|-----------------------------------|---------------------------------------------|------------------|
| Identification code               | 4                                           |                  |
| Empirical formula                 | C <sub>27</sub> H <sub>30</sub> B N         |                  |
| Formula weight                    | 379.33                                      |                  |
| Temperature                       | 298(2) K                                    |                  |
| Wavelength                        | 0.71073 Å                                   |                  |
| Crystal system                    | Triclinic                                   |                  |
| Space group                       | P-1                                         |                  |
| Unit cell dimensions              | a = 8.4989(11) Å                            | α = 100.384(2)°. |
|                                   | b = 10.0999(14) Å                           | β = 106.956(2)°. |
|                                   | c = 14.424(2) Å                             | γ = 103.731(2)°. |
| Volume                            | 1108.2(3) Å <sup>3</sup>                    |                  |
| Z                                 | 2                                           |                  |
| Density (calculated)              | 1.137 Mg/m <sup>3</sup>                     |                  |
| Absorption coefficient            | 0.064 mm <sup>-1</sup>                      |                  |
| F(000)                            | 408                                         |                  |
| Crystal size                      | 0.3 x 0.2 x 0.2 mm <sup>3</sup>             |                  |
| Theta range for data collection   | 2.15 to 28.28°.                             |                  |
| Index ranges                      | -9 ≤ h ≤ 11, -13 ≤ k ≤ 13, -17 ≤ l ≤ 18     |                  |
| Reflections collected             | 7919                                        |                  |
| Independent reflections           | 5020 [R(int) = 0.0228]                      |                  |
| Completeness to theta = 28.28°    | 91.0 %                                      |                  |
| Absorption correction             | SADABS                                      |                  |
| Max. and min. transmission        | 1.000 and 0.820                             |                  |
| Refinement method                 | Full-matrix least-squares on F <sup>2</sup> |                  |
| Data / restraints / parameters    | 5020 / 0 / 269                              |                  |
| Goodness-of-fit on F <sup>2</sup> | 0.832                                       |                  |
| Final R indices [I > 2σ(I)]       | R1 = 0.0533, wR2 = 0.1197                   |                  |
| R indices (all data)              | R1 = 0.1386, wR2 = 0.1419                   |                  |
| Largest diff. peak and hole       | 0.144 and -0.159 e.Å <sup>-3</sup>          |                  |



Table 2. Atomic coordinates ( $\times 10^4$ ) and equivalent isotropic displacement parameters ( $\text{\AA}^2 \times 10^3$ ) for 4. U(eq) is defined as one third of the trace of the orthogonalized  $U^{ij}$  tensor.

|       | x        | y        | z       | U(eq) |
|-------|----------|----------|---------|-------|
| N     | 681(2)   | 9574(2)  | 2234(1) | 52(1) |
| B     | -579(3)  | 8222(3)  | 2083(2) | 48(1) |
| C(1)  | 649(3)   | 10120(2) | 1389(2) | 64(1) |
| C(2)  | 2093(3)  | 11148(2) | 1586(2) | 71(1) |
| C(3)  | 4716(3)  | 12389(3) | 3213(2) | 77(1) |
| C(4)  | 5337(3)  | 12437(3) | 4206(2) | 84(1) |
| C(5)  | 4396(3)  | 11514(3) | 4598(2) | 74(1) |
| C(6)  | 2826(3)  | 10493(2) | 4031(2) | 57(1) |
| C(7)  | 2249(2)  | 10419(2) | 3005(2) | 51(1) |
| C(8)  | 3147(3)  | 11388(2) | 2610(2) | 58(1) |
| C(9)  | -105(2)  | 7062(2)  | 2607(1) | 48(1) |
| C(10) | -1164(2) | 6322(2)  | 3052(2) | 53(1) |
| C(11) | -745(3)  | 5259(2)  | 3468(2) | 58(1) |
| C(12) | 691(3)   | 4853(2)  | 3445(2) | 61(1) |
| C(13) | 1711(3)  | 5565(2)  | 2989(2) | 60(1) |
| C(14) | 1365(2)  | 6646(2)  | 2581(2) | 53(1) |
| C(15) | 2586(3)  | 7312(2)  | 2099(2) | 72(1) |
| C(16) | 1084(3)  | 3671(3)  | 3878(2) | 87(1) |
| C(17) | -2768(3) | 6670(3)  | 3136(2) | 73(1) |
| C(18) | -2406(2) | 7983(2)  | 1284(2) | 48(1) |
| C(19) | -3079(3) | 6936(2)  | 363(2)  | 54(1) |
| C(20) | -4703(3) | 6776(2)  | -320(2) | 66(1) |
| C(21) | -5686(3) | 7632(3)  | -127(2) | 62(1) |
| C(22) | -4996(3) | 8667(2)  | 764(2)  | 62(1) |
| C(23) | -3401(2) | 8858(2)  | 1474(2) | 54(1) |
| C(24) | -2804(3) | 9993(2)  | 2446(2) | 75(1) |
| C(25) | -7459(3) | 7431(3)  | -868(2) | 95(1) |
| C(26) | -2031(3) | 6021(2)  | 72(2)   | 73(1) |
| C(27) | 1827(3)  | 9614(3)  | 4531(2) | 75(1) |

Table 3. Bond lengths [ $\text{\AA}$ ] and angles [ $^\circ$ ] for 4.

|             |            |                   |            |
|-------------|------------|-------------------|------------|
| N-C(7)      | 1.412(2)   | C(7)-N-B          | 134.71(18) |
| N-C(1)      | 1.422(2)   | C(1)-N-B          | 118.48(18) |
| N-B         | 1.457(3)   | N-B-C(9)          | 122.73(18) |
| B-C(9)      | 1.572(3)   | N-B-C(18)         | 113.85(18) |
| B-C(18)     | 1.574(3)   | C(9)-B-C(18)      | 123.23(18) |
| C(1)-C(2)   | 1.323(3)   | C(2)-C(1)-N       | 111.1(2)   |
| C(2)-C(8)   | 1.428(3)   | C(1)-C(2)-C(8)    | 108.1(2)   |
| C(3)-C(4)   | 1.362(3)   | C(4)-C(3)-C(8)    | 118.4(2)   |
| C(3)-C(8)   | 1.386(3)   | C(3)-C(4)-C(5)    | 120.2(2)   |
| C(4)-C(5)   | 1.389(3)   | C(6)-C(5)-C(4)    | 123.8(2)   |
| C(5)-C(6)   | 1.385(3)   | C(5)-C(6)-C(7)    | 115.1(2)   |
| C(6)-C(7)   | 1.398(3)   | C(5)-C(6)-C(27)   | 120.2(2)   |
| C(6)-C(27)  | 1.504(3)   | C(7)-C(6)-C(27)   | 124.57(19) |
| C(7)-C(8)   | 1.402(3)   | C(6)-C(7)-C(8)    | 121.5(2)   |
| C(9)-C(10)  | 1.405(3)   | C(6)-C(7)-N       | 129.77(19) |
| C(9)-C(14)  | 1.417(2)   | C(8)-C(7)-N       | 108.28(19) |
| C(10)-C(11) | 1.390(3)   | C(3)-C(8)-C(7)    | 120.9(2)   |
| C(10)-C(17) | 1.517(3)   | C(3)-C(8)-C(2)    | 131.9(2)   |
| C(11)-C(12) | 1.383(3)   | C(7)-C(8)-C(2)    | 107.09(19) |
| C(12)-C(13) | 1.381(3)   | C(10)-C(9)-C(14)  | 116.97(19) |
| C(12)-C(16) | 1.504(3)   | C(10)-C(9)-B      | 122.27(17) |
| C(13)-C(14) | 1.381(3)   | C(14)-C(9)-B      | 120.61(17) |
| C(14)-C(15) | 1.508(3)   | C(11)-C(10)-C(9)  | 120.71(18) |
| C(18)-C(19) | 1.404(3)   | C(11)-C(10)-C(17) | 116.97(19) |
| C(18)-C(23) | 1.405(3)   | C(9)-C(10)-C(17)  | 122.28(19) |
| C(19)-C(20) | 1.395(3)   | C(12)-C(11)-C(10) | 122.3(2)   |
| C(19)-C(26) | 1.513(3)   | C(13)-C(12)-C(11) | 116.8(2)   |
| C(20)-C(21) | 1.385(3)   | C(13)-C(12)-C(16) | 122.2(2)   |
| C(21)-C(22) | 1.369(3)   | C(11)-C(12)-C(16) | 121.0(2)   |
| C(21)-C(25) | 1.513(3)   | C(14)-C(13)-C(12) | 123.04(19) |
| C(22)-C(23) | 1.385(3)   | C(13)-C(14)-C(9)  | 120.17(19) |
| C(23)-C(24) | 1.506(3)   | C(13)-C(14)-C(15) | 116.97(18) |
|             |            | C(9)-C(14)-C(15)  | 122.8(2)   |
| C(7)-N-C(1) | 105.32(16) | C(19)-C(18)-C(23) | 117.98(19) |

|                   |            |                   |            |
|-------------------|------------|-------------------|------------|
| C(19)-C(18)-B     | 122.28(18) | C(22)-C(21)-C(25) | 121.2(2)   |
| C(23)-C(18)-B     | 119.72(19) | C(20)-C(21)-C(25) | 121.5(2)   |
| C(20)-C(19)-C(18) | 119.8(2)   | C(21)-C(22)-C(23) | 122.9(2)   |
| C(20)-C(19)-C(26) | 119.0(2)   | C(22)-C(23)-C(18) | 119.9(2)   |
| C(18)-C(19)-C(26) | 121.06(19) | C(22)-C(23)-C(24) | 118.2(2)   |
| C(21)-C(20)-C(19) | 122.0(2)   | C(18)-C(23)-C(24) | 121.92(19) |
| C(22)-C(21)-C(20) | 117.4(2)   |                   |            |

Table 4. Anisotropic displacement parameters ( $\text{\AA}^2 \times 10^3$ ) for 4. The anisotropic displacement factor exponent takes the form:  $-2\pi^2 [ h^2 a^{*2} U^{11} + \dots + 2 h k a^* b^* U^{12} ]$

|       | $U^{11}$ | $U^{22}$ | $U^{33}$ | $U^{23}$ | $U^{13}$ | $U^{12}$ |
|-------|----------|----------|----------|----------|----------|----------|
| N     | 49(1)    | 55(1)    | 48(1)    | 14(1)    | 13(1)    | 13(1)    |
| B     | 51(1)    | 54(2)    | 45(2)    | 10(1)    | 25(1)    | 18(1)    |
| C(1)  | 64(1)    | 70(2)    | 53(2)    | 27(1)    | 13(1)    | 13(1)    |
| C(2)  | 69(2)    | 70(2)    | 77(2)    | 35(2)    | 27(2)    | 13(1)    |
| C(3)  | 57(2)    | 66(2)    | 95(2)    | 15(2)    | 19(2)    | 8(1)     |
| C(4)  | 59(2)    | 74(2)    | 95(2)    | 6(2)     | 8(2)     | 11(1)    |
| C(5)  | 66(2)    | 76(2)    | 65(2)    | 6(2)     | 9(1)     | 24(1)    |
| C(6)  | 53(1)    | 63(2)    | 54(2)    | 10(1)    | 14(1)    | 26(1)    |
| C(7)  | 42(1)    | 52(1)    | 55(2)    | 8(1)     | 11(1)    | 17(1)    |
| C(8)  | 49(1)    | 54(1)    | 71(2)    | 18(1)    | 21(1)    | 14(1)    |
| C(9)  | 44(1)    | 54(1)    | 45(1)    | 12(1)    | 16(1)    | 15(1)    |
| C(10) | 49(1)    | 57(1)    | 51(1)    | 12(1)    | 15(1)    | 16(1)    |
| C(11) | 60(1)    | 57(1)    | 56(2)    | 18(1)    | 20(1)    | 13(1)    |
| C(12) | 64(1)    | 56(2)    | 53(2)    | 9(1)     | 9(1)     | 23(1)    |
| C(13) | 53(1)    | 65(2)    | 62(2)    | 12(1)    | 17(1)    | 26(1)    |
| C(14) | 47(1)    | 56(1)    | 51(1)    | 7(1)     | 15(1)    | 14(1)    |
| C(15) | 64(1)    | 77(2)    | 87(2)    | 21(2)    | 41(1)    | 29(1)    |
| C(16) | 105(2)   | 76(2)    | 85(2)    | 29(2)    | 22(2)    | 44(2)    |
| C(17) | 65(1)    | 88(2)    | 89(2)    | 40(2)    | 43(1)    | 30(1)    |
| C(18) | 49(1)    | 48(1)    | 50(1)    | 18(1)    | 20(1)    | 14(1)    |
| C(19) | 55(1)    | 52(1)    | 54(2)    | 18(1)    | 23(1)    | 8(1)     |
| C(20) | 64(1)    | 65(2)    | 53(2)    | 18(1)    | 13(1)    | 1(1)     |

|       |       |        |       |       |       |       |
|-------|-------|--------|-------|-------|-------|-------|
| C(21) | 52(1) | 71(2)  | 60(2) | 32(1) | 12(1) | 11(1) |
| C(22) | 56(1) | 70(2)  | 68(2) | 31(2) | 22(1) | 23(1) |
| C(23) | 51(1) | 56(1)  | 53(2) | 18(1) | 16(1) | 13(1) |
| C(24) | 82(2) | 75(2)  | 71(2) | 15(2) | 25(1) | 36(1) |
| C(25) | 66(2) | 112(2) | 88(2) | 44(2) | -3(2) | 18(2) |
| C(26) | 78(2) | 68(2)  | 65(2) | 5(1)  | 24(1) | 17(1) |
| C(27) | 75(2) | 99(2)  | 49(2) | 15(1) | 19(1) | 29(2) |

Table 5. Hydrogen coordinates ( $\times 10^4$ ) and isotropic displacement parameters ( $\text{\AA}^2 \times 10^{-3}$ ) for 4.

|        | x     | y     | z    | U(eq) |
|--------|-------|-------|------|-------|
| H(1A)  | -267  | 9797  | 778  | 77    |
| H(2A)  | 2373  | 11631 | 1136 | 86    |
| H(3A)  | 5328  | 13013 | 2945 | 92    |
| H(4A)  | 6395  | 13089 | 4622 | 101   |
| H(5A)  | 4845  | 11586 | 5282 | 89    |
| H(11A) | -1454 | 4803  | 3774 | 70    |
| H(13A) | 2675  | 5303  | 2954 | 72    |
| H(15A) | 3254  | 6704  | 1969 | 107   |
| H(15B) | 3347  | 8210  | 2543 | 107   |
| H(15C) | 1934  | 7448  | 1476 | 107   |
| H(16A) | 292   | 3374  | 4212 | 130   |
| H(16B) | 2246  | 3996  | 4351 | 130   |
| H(16C) | 964   | 2888  | 3345 | 130   |
| H(17A) | -3376 | 5986  | 3395 | 110   |
| H(17B) | -3506 | 6647  | 2483 | 110   |
| H(17C) | -2435 | 7596  | 3582 | 110   |
| H(20A) | -5138 | 6072  | -924 | 79    |
| H(22A) | -5625 | 9268  | 899  | 74    |
| H(24A) | -3767 | 10283 | 2521 | 112   |
| H(24B) | -1934 | 10791 | 2437 | 112   |
| H(24C) | -2330 | 9630  | 2999 | 112   |
| H(25A) | -7790 | 8267  | -715 | 143   |

|        |       |       |       |     |
|--------|-------|-------|-------|-----|
| H(25B) | -8283 | 6636  | -820  | 143 |
| H(25C) | -7428 | 7263  | -1538 | 143 |
| H(26A) | -2782 | 5208  | -469  | 110 |
| H(26B) | -1475 | 5720  | 641   | 110 |
| H(26C) | -1172 | 6557  | -139  | 110 |
| H(27A) | 648   | 9616  | 4305  | 113 |
| H(27B) | 2332  | 10005 | 5247  | 113 |
| H(27C) | 1864  | 8661  | 4360  | 113 |

---

Table 1. Crystal data and structure refinement for 5.

|                                   |                                                  |                   |
|-----------------------------------|--------------------------------------------------|-------------------|
| Identification code               | 5                                                |                   |
| Empirical formula                 | C <sub>32</sub> H <sub>32</sub> B <sub>2</sub> N |                   |
| Formula weight                    | 441.40                                           |                   |
| Temperature                       | 180(2) K                                         |                   |
| Wavelength                        | 0.71073 Å                                        |                   |
| Crystal system                    | Monoclinic                                       |                   |
| Space group                       | P2(1)/c                                          |                   |
| Unit cell dimensions              | a = 11.4353(10) Å                                | α = 90°.          |
|                                   | b = 18.5158(15) Å                                | β = 92.2680(10)°. |
|                                   | c = 11.9490(10) Å                                | γ = 90°.          |
| Volume                            | 2528.0(4) Å <sup>3</sup>                         |                   |
| Z                                 | 4                                                |                   |
| Density (calculated)              | 1.160 Mg/m <sup>3</sup>                          |                   |
| Absorption coefficient            | 0.066 mm <sup>-1</sup>                           |                   |
| F(000)                            | 944                                              |                   |
| Crystal size                      | 0.30 x 0.20 x 0.12 mm <sup>3</sup>               |                   |
| Theta range for data collection   | 1.78 to 28.25°.                                  |                   |
| Index ranges                      | -13 ≤ h ≤ 14, -24 ≤ k ≤ 24, -15 ≤ l ≤ 14         |                   |
| Reflections collected             | 17595                                            |                   |
| Independent reflections           | 5892 [R(int) = 0.0336]                           |                   |
| Completeness to theta = 28.25°    | 94.1 %                                           |                   |
| Absorption correction             | SADABS                                           |                   |
| Max. and min. transmission        | 1.000 and 0.879                                  |                   |
| Refinement method                 | Full-matrix least-squares on F <sup>2</sup>      |                   |
| Data / restraints / parameters    | 5892 / 0 / 369                                   |                   |
| Goodness-of-fit on F <sup>2</sup> | 0.905                                            |                   |
| Final R indices [I > 2σ(I)]       | R1 = 0.0496, wR2 = 0.1110                        |                   |
| R indices (all data)              | R1 = 0.0945, wR2 = 0.1230                        |                   |
| Largest diff. peak and hole       | 0.277 and -0.200 e.Å <sup>-3</sup>               |                   |

Table 2. Atomic coordinates ( $\times 10^4$ ) and equivalent isotropic displacement parameters ( $\text{\AA}^2 \times 10^3$ ) for 5. U(eq) is defined as one third of the trace of the orthogonalized  $U^{ij}$  tensor.

|       | x       | y       | z        | U(eq) |
|-------|---------|---------|----------|-------|
| N     | 2621(1) | 955(1)  | 8156(1)  | 30(1) |
| B     | 3045(2) | 1236(1) | 9225(2)  | 30(1) |
| C(1)  | 3317(2) | 633(1)  | 7350(1)  | 33(1) |
| C(2)  | 2686(2) | 456(1)  | 6408(1)  | 32(1) |
| C(3)  | 486(2)  | 702(1)  | 5890(2)  | 35(1) |
| C(4)  | -530(2) | 982(1)  | 6292(2)  | 38(1) |
| C(5)  | -554(2) | 1249(1) | 7380(2)  | 37(1) |
| C(6)  | 441(2)  | 1258(1) | 8083(2)  | 32(1) |
| C(7)  | 1471(1) | 980(1)  | 7672(1)  | 29(1) |
| C(8)  | 1498(1) | 693(1)  | 6583(1)  | 30(1) |
| C(9)  | 2146(1) | 1306(1) | 10179(1) | 29(1) |
| C(10) | 1844(2) | 1990(1) | 10601(1) | 34(1) |
| C(11) | 1042(2) | 2043(1) | 11437(2) | 41(1) |
| C(12) | 530(2)  | 1438(1) | 11897(2) | 42(1) |
| C(13) | 827(2)  | 766(1)  | 11485(2) | 39(1) |
| C(14) | 1607(1) | 689(1)  | 10626(1) | 33(1) |
| C(15) | 1858(2) | -64(1)  | 10203(2) | 42(1) |
| C(16) | -346(2) | 1503(1) | 12812(2) | 63(1) |
| C(17) | 2325(2) | 2668(1) | 10087(2) | 44(1) |
| C(18) | 4372(1) | 1477(1) | 9366(1)  | 31(1) |
| C(19) | 5081(2) | 1254(1) | 10302(1) | 33(1) |
| C(20) | 6208(2) | 1517(1) | 10459(2) | 39(1) |
| C(21) | 6692(2) | 2009(1) | 9737(2)  | 42(1) |
| C(22) | 5996(2) | 2232(1) | 8827(2)  | 42(1) |
| C(23) | 4859(2) | 1980(1) | 8625(1)  | 35(1) |
| C(24) | 4175(2) | 2295(1) | 7626(2)  | 48(1) |
| C(25) | 7916(2) | 2297(1) | 9954(2)  | 63(1) |
| C(26) | 4643(2) | 725(1)  | 11148(2) | 44(1) |
| C(27) | 3086(1) | 64(1)   | 5416(1)  | 33(1) |
| C(28) | 3711(2) | -578(1) | 5532(2)  | 42(1) |
| C(29) | 4027(2) | -968(1) | 4600(2)  | 48(1) |

|       |         |         |         |       |
|-------|---------|---------|---------|-------|
| C(30) | 3718(2) | -726(1) | 3537(2) | 45(1) |
| C(31) | 3117(2) | -83(1)  | 3409(2) | 42(1) |
| C(32) | 2806(2) | 311(1)  | 4333(2) | 37(1) |

---

Table 3. Bond lengths [ $\text{\AA}$ ] and angles [ $^\circ$ ] for **5**.

|             |          |                 |            |
|-------------|----------|-----------------|------------|
| N-C(1)      | 1.406(2) | C(21)-C(25)     | 1.511(3)   |
| N-C(7)      | 1.416(2) | C(22)-C(23)     | 1.393(2)   |
| N-B         | 1.444(2) | C(23)-C(24)     | 1.518(2)   |
| B-C(9)      | 1.570(2) | C(27)-C(28)     | 1.390(2)   |
| B-C(18)     | 1.584(2) | C(27)-C(32)     | 1.397(2)   |
| C(1)-C(2)   | 1.353(2) | C(28)-C(29)     | 1.389(2)   |
| C(2)-C(8)   | 1.451(2) | C(29)-C(30)     | 1.380(3)   |
| C(2)-C(27)  | 1.479(2) | C(30)-C(31)     | 1.380(3)   |
| C(3)-C(4)   | 1.376(2) | C(31)-C(32)     | 1.382(2)   |
| C(3)-C(8)   | 1.396(2) |                 |            |
| C(4)-C(5)   | 1.393(3) | C(1)-N-C(7)     | 106.02(13) |
| C(5)-C(6)   | 1.386(2) | C(1)-N-B        | 125.40(14) |
| C(6)-C(7)   | 1.393(2) | C(7)-N-B        | 128.48(14) |
| C(7)-C(8)   | 1.408(2) | N-B-C(9)        | 117.76(15) |
| C(9)-C(10)  | 1.411(2) | N-B-C(18)       | 118.79(15) |
| C(9)-C(14)  | 1.412(2) | C(9)-B-C(18)    | 123.43(15) |
| C(10)-C(11) | 1.386(2) | C(2)-C(1)-N     | 112.02(15) |
| C(10)-C(17) | 1.512(2) | C(1)-C(2)-C(8)  | 106.20(14) |
| C(11)-C(12) | 1.388(3) | C(1)-C(2)-C(27) | 127.92(15) |
| C(12)-C(13) | 1.384(2) | C(8)-C(2)-C(27) | 125.80(15) |
| C(12)-C(16) | 1.517(2) | C(4)-C(3)-C(8)  | 119.22(17) |
| C(13)-C(14) | 1.393(2) | C(3)-C(4)-C(5)  | 120.54(18) |
| C(14)-C(15) | 1.515(2) | C(6)-C(5)-C(4)  | 121.57(17) |
| C(18)-C(23) | 1.416(2) | C(5)-C(6)-C(7)  | 117.88(17) |
| C(18)-C(19) | 1.416(2) | C(6)-C(7)-C(8)  | 120.97(16) |
| C(19)-C(20) | 1.384(2) | C(6)-C(7)-N     | 130.81(15) |
| C(19)-C(26) | 1.507(2) | C(8)-C(7)-N     | 108.14(14) |
| C(20)-C(21) | 1.384(3) | C(3)-C(8)-C(7)  | 119.78(16) |
| C(21)-C(22) | 1.384(3) | C(3)-C(8)-C(2)  | 132.61(16) |



|                   |            |                   |            |
|-------------------|------------|-------------------|------------|
| C(7)-C(8)-C(2)    | 107.56(14) | C(20)-C(19)-C(26) | 118.03(16) |
| C(10)-C(9)-C(14)  | 118.30(15) | C(18)-C(19)-C(26) | 121.58(15) |
| C(10)-C(9)-B      | 120.66(14) | C(19)-C(20)-C(21) | 122.70(18) |
| C(14)-C(9)-B      | 121.03(14) | C(22)-C(21)-C(20) | 117.00(17) |
| C(11)-C(10)-C(9)  | 119.96(16) | C(22)-C(21)-C(25) | 121.91(18) |
| C(11)-C(10)-C(17) | 119.73(15) | C(20)-C(21)-C(25) | 121.07(18) |
| C(9)-C(10)-C(17)  | 120.16(15) | C(21)-C(22)-C(23) | 122.66(17) |
| C(10)-C(11)-C(12) | 121.97(17) | C(22)-C(23)-C(18) | 119.98(17) |
| C(13)-C(12)-C(11) | 118.08(17) | C(22)-C(23)-C(24) | 117.13(16) |
| C(13)-C(12)-C(16) | 120.48(18) | C(18)-C(23)-C(24) | 122.82(16) |
| C(11)-C(12)-C(16) | 121.43(17) | C(28)-C(27)-C(32) | 118.06(16) |
| C(12)-C(13)-C(14) | 121.85(17) | C(28)-C(27)-C(2)  | 120.88(15) |
| C(13)-C(14)-C(9)  | 119.80(16) | C(32)-C(27)-C(2)  | 121.00(15) |
| C(13)-C(14)-C(15) | 118.40(15) | C(29)-C(28)-C(27) | 120.92(19) |
| C(9)-C(14)-C(15)  | 121.80(15) | C(30)-C(29)-C(28) | 120.27(19) |
| C(23)-C(18)-C(19) | 117.28(15) | C(29)-C(30)-C(31) | 119.38(18) |
| C(23)-C(18)-B     | 121.20(15) | C(30)-C(31)-C(32) | 120.67(19) |
| C(19)-C(18)-B     | 121.22(14) | C(31)-C(32)-C(27) | 120.67(18) |
| C(20)-C(19)-C(18) | 120.38(16) |                   |            |

Table 4. Anisotropic displacement parameters ( $\text{\AA}^2 \times 10^3$ ) for 5. The anisotropic displacement factor exponent takes the form:  $-2\pi^2 [ h^2 a^{*2} U^{11} + \dots + 2 h k a^* b^* U^{12} ]$

|      | $U^{11}$ | $U^{22}$ | $U^{33}$ | $U^{23}$ | $U^{13}$ | $U^{12}$ |
|------|----------|----------|----------|----------|----------|----------|
| N    | 31(1)    | 32(1)    | 28(1)    | -2(1)    | 1(1)     | 1(1)     |
| B    | 40(1)    | 22(1)    | 30(1)    | 3(1)     | -1(1)    | 3(1)     |
| C(1) | 31(1)    | 35(1)    | 32(1)    | 0(1)     | 4(1)     | 2(1)     |
| C(2) | 36(1)    | 31(1)    | 28(1)    | 1(1)     | 1(1)     | -2(1)    |
| C(3) | 39(1)    | 36(1)    | 30(1)    | 0(1)     | -2(1)    | -9(1)    |
| C(4) | 32(1)    | 41(1)    | 40(1)    | 4(1)     | -7(1)    | -7(1)    |
| C(5) | 32(1)    | 37(1)    | 43(1)    | 4(1)     | 4(1)     | -1(1)    |
| C(6) | 33(1)    | 34(1)    | 31(1)    | 1(1)     | 3(1)     | -1(1)    |
| C(7) | 31(1)    | 26(1)    | 31(1)    | 3(1)     | -1(1)    | -3(1)    |
| C(8) | 35(1)    | 26(1)    | 30(1)    | 1(1)     | 1(1)     | -5(1)    |

|       |       |       |       |        |       |        |
|-------|-------|-------|-------|--------|-------|--------|
| C(9)  | 29(1) | 32(1) | 26(1) | -3(1)  | -4(1) | 2(1)   |
| C(10) | 37(1) | 34(1) | 31(1) | -6(1)  | -5(1) | 3(1)   |
| C(11) | 44(1) | 42(1) | 38(1) | -12(1) | 1(1)  | 10(1)  |
| C(12) | 37(1) | 57(1) | 33(1) | -3(1)  | 4(1)  | 8(1)   |
| C(13) | 36(1) | 45(1) | 37(1) | 5(1)   | 2(1)  | -1(1)  |
| C(14) | 33(1) | 37(1) | 29(1) | -2(1)  | -1(1) | 0(1)   |
| C(15) | 51(1) | 34(1) | 42(1) | 0(1)   | 5(1)  | -5(1)  |
| C(16) | 60(1) | 82(2) | 49(1) | -3(1)  | 22(1) | 12(1)  |
| C(17) | 55(1) | 32(1) | 47(1) | -6(1)  | 3(1)  | 5(1)   |
| C(18) | 34(1) | 30(1) | 28(1) | -5(1)  | 2(1)  | 2(1)   |
| C(19) | 35(1) | 31(1) | 32(1) | -5(1)  | 1(1)  | 4(1)   |
| C(20) | 35(1) | 44(1) | 37(1) | -7(1)  | -5(1) | 6(1)   |
| C(21) | 36(1) | 46(1) | 44(1) | -12(1) | 4(1)  | -5(1)  |
| C(22) | 43(1) | 40(1) | 42(1) | -2(1)  | 10(1) | -8(1)  |
| C(23) | 40(1) | 34(1) | 31(1) | -2(1)  | 3(1)  | 1(1)   |
| C(24) | 54(1) | 48(1) | 41(1) | 12(1)  | 1(1)  | -6(1)  |
| C(25) | 41(1) | 79(2) | 69(2) | -7(1)  | 1(1)  | -16(1) |
| C(26) | 44(1) | 48(1) | 38(1) | 9(1)   | -6(1) | 2(1)   |
| C(27) | 33(1) | 35(1) | 30(1) | -3(1)  | 3(1)  | -6(1)  |
| C(28) | 45(1) | 44(1) | 36(1) | -1(1)  | 1(1)  | 4(1)   |
| C(29) | 46(1) | 48(1) | 51(1) | -11(1) | 9(1)  | 6(1)   |
| C(30) | 36(1) | 59(1) | 41(1) | -16(1) | 12(1) | -9(1)  |
| C(31) | 39(1) | 60(1) | 29(1) | -1(1)  | 5(1)  | -11(1) |
| C(32) | 38(1) | 40(1) | 35(1) | 0(1)   | 4(1)  | -3(1)  |

Table 5. Hydrogen coordinates ( $\times 10^4$ ) and isotropic displacement parameters ( $\text{\AA}^2 \times 10^{-3}$ ) for 5.

|      | x         | y       | z        | U(eq) |
|------|-----------|---------|----------|-------|
| H(1) | 4123(15)  | 559(9)  | 7515(14) | 39(5) |
| H(3) | 510(14)   | 518(8)  | 5122(15) | 37(5) |
| H(4) | -1250(16) | 1000(9) | 5832(15) | 48(5) |
| H(5) | -1277(14) | 1448(8) | 7685(13) | 33(4) |
| H(6) | 399(14)   | 1453(8) | 8837(14) | 34(4) |

|        |          |           |           |       |
|--------|----------|-----------|-----------|-------|
| H(11)  | 837(14)  | 2500(9)   | 11687(14) | 41(5) |
| H(13)  | 474(14)  | 340(9)    | 11778(14) | 37(5) |
| H(15A) | 1809     | -410      | 10820     | 63    |
| H(15B) | 2646     | -78       | 9909      | 63    |
| H(15C) | 1282     | -191      | 9606      | 63    |
| H(16A) | -966     | 1843      | 12575     | 95    |
| H(16B) | 52       | 1681      | 13499     | 95    |
| H(16C) | -691     | 1029      | 12953     | 95    |
| H(17A) | 2097     | 3089      | 10526     | 67    |
| H(17B) | 2009     | 2718      | 9316      | 67    |
| H(17C) | 3180     | 2638      | 10084     | 67    |
| H(20)  | 6679(15) | 1350(8)   | 11073(14) | 37(5) |
| H(22)  | 6330(14) | 2574(8)   | 8324(14)  | 38(5) |
| H(24A) | 4515     | 2762      | 7427      | 72    |
| H(24B) | 3357     | 2364      | 7817      | 72    |
| H(24C) | 4213     | 1964      | 6989      | 72    |
| H(25A) | 8470     | 1894      | 10007     | 95    |
| H(25B) | 7949     | 2570      | 10658     | 95    |
| H(25C) | 8123     | 2616      | 9337      | 95    |
| H(26A) | 5270     | 619       | 11706     | 66    |
| H(26B) | 4401     | 278       | 10767     | 66    |
| H(26C) | 3974     | 934       | 11520     | 66    |
| H(28)  | 3924(16) | -759(9)   | 6320(16)  | 52(5) |
| H(29)  | 4501(16) | -1413(10) | 4715(16)  | 62(6) |
| H(30)  | 3915(15) | -1024(9)  | 2851(16)  | 50(5) |
| H(31)  | 2915(14) | 91(9)     | 2654(15)  | 44(5) |
| H(32)  | 2386(14) | 772(9)    | 4225(14)  | 38(5) |

---
